# Supplementary material for: One-pot synthesis of 2-chloro-2-thio/selenocyanato ketones from β-keto acids
Source: Royal Society of Chemistry journal article supplement (doi:10.1039/d1qo00405k), 2021-01-01

Supporting Information for

One-pot synthesis of 2-chloro-2-thio/selenocyanato ketones from  $\beta$ -keto acids

Di Wu,<sup>a</sup> Chengcheng Li,<sup>a</sup> Yongjie Duan,<sup>a</sup> Hongquan Yin<sup>a</sup> and Fu-Xue, Chen<sup>\*a</sup>

<sup>a</sup>School of chemistry School of Chemistry & Chemical Engineering, Beijing Institute of Technology (Liangxiang Campus). No. 8 Liangxiang East Road Fangshan District, Beijing 102488, China.

## Table of Content

|                                                                             |    |
|-----------------------------------------------------------------------------|----|
| 1. General Information .....                                                | 3  |
| 2. General procedure.....                                                   | 3  |
| 2.1 general procedure for the synthesis of <b>2a-2j</b> .....               | 3  |
| 2.2 general procedure for the synthesis of <b>4a-4m</b> .....               | 3  |
| 3. Optimization of the asymmetric reaction conditions. ....                 | 3  |
| 4. Spectral data of the products .....                                      | 5  |
| 5. Copies of HPLC chromatograms.....                                        | 11 |
| 6. Copies of $^1\text{H}$ and $^{13}\text{C}\{\text{H}\}$ NMR spectra. .... | 12 |

## 1. General Information

All reactions were carried out under argon atmosphere, unless otherwise stated. All chemicals were purchased from commercial companies. All the HPLC columns were purchased from Daicel Chemical Industries. Solvents of petroleum ether (PE) and ethyl acetate (EA) were used directly in column chromatography. Toluene, THF were dried over sodium (diphenyl ketone) and distilled; CH<sub>2</sub>Cl<sub>2</sub> and MeCN were distilled over CaH<sub>2</sub> before use. <sup>1</sup>H NMR spectra were recorded on a Bruker Avance400 (400 MHz) spectrometer, all signals are reported in ppm with the internal chloroform signal at 7.26 ppm as the standard. <sup>13</sup>C{<sup>1</sup>H} NMR spectra were recorded on a Bruker Avance400 (100 MHz) spectrometer, all signals are reported in ppm with the internal chloroform signal at 77.0 ppm as the standard. The data is reported as (s = singlet, d = doublet, t = triplet, m = multiplet or unresolved, coupling constant(s) in Hz, integration, assignment). Other analyses were carried out on the following instruments. Infrared spectrometer: Bruker ALPHA FT-IR-Spektrometer. High resolution mass spectrum: AGILENT 7890A/5975C. Rotation polarity: Krüss P8000. High performance liquid chromatography: Shimadzu LC-20A. Melting point detector: Binocular microscope XT4A melting point apparatus (without correct).

## 2. General procedure

### 2.1 general procedure for the synthesis of **2a-2j**

**1** (0.10 mmol, 1.0 equiv), **Cl-1** (0.11 mmol, 1.1 equiv) and THF (1.0 mL) was added to a glass tube under argon atmosphere, and it was stirred 2 h at 0 °C. Then, **SCN-2** (0.11 mmol, 1.1 equiv) and quinine (0.01 mmol, 10 mol %) were added to the system, and the reaction system was continually stirred overnight at 0 °C. The reaction mixture was purified by column chromatography on silica gel with petroleum ether/ethyl acetate (5:1, v/v) to afford the pure desired product.

### 2.2 general procedure for the synthesis of **4a-4m**

**3** (0.10 mmol, 1.0 equiv), **Cl-1** (0.11 mmol, 1.1 equiv) and THF (1.0 mL) was added to a glass tube under argon atmosphere, and it was stirred 2 h at 0 °C. Then, **SeCN-1** (0.11 mmol, 1.1 equiv) and quinine (0.01 mmol, 10 mol %) were added to the system, and the reaction system was continually stirred overnight at 0 °C. The reaction mixture was purified by column chromatography on silica gel with petroleum ether/ethyl acetate (5:1, v/v) to afford the pure desired product.

## 3. Optimization of the asymmetric reaction conditions.

**Table S1** Optimization of the asymmetric reaction conditions

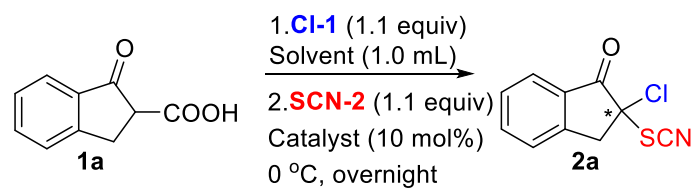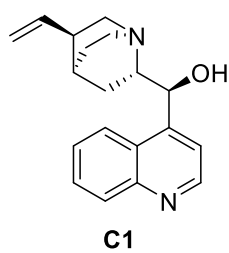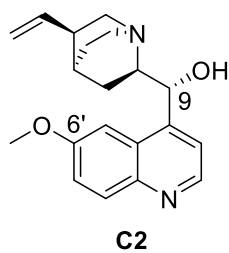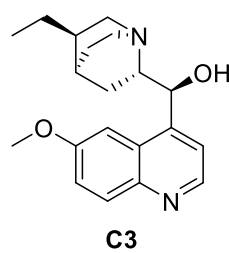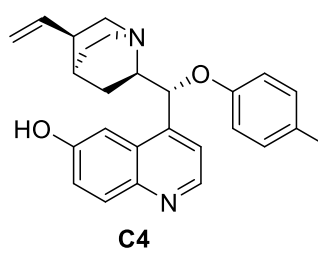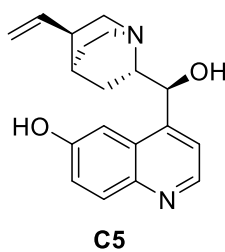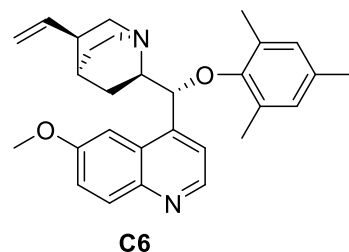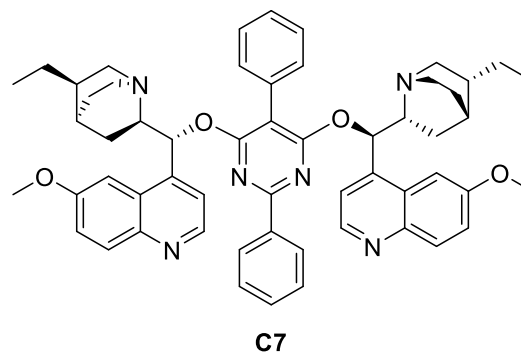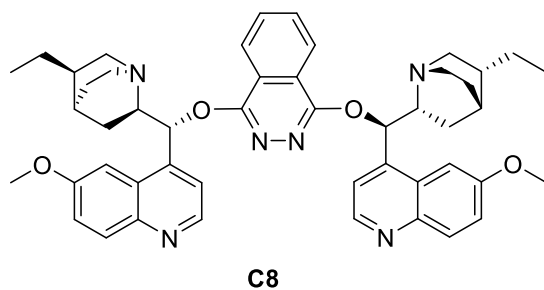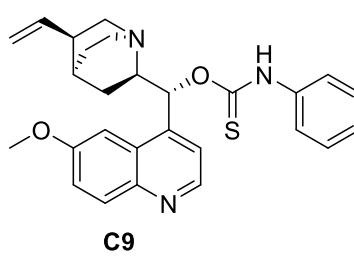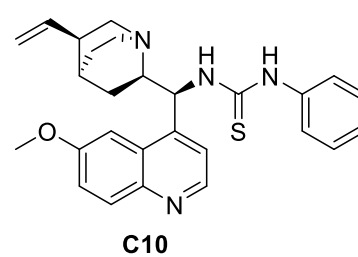

| entry           | catalyst   | solvent                         | Yield (%) | ee (%) |
|-----------------|------------|---------------------------------|-----------|--------|
| 1               | <b>C1</b>  | THF                             | 75        | 17     |
| 2               | <b>C2</b>  | THF                             | 90        | -30    |
| 3               | <b>C3</b>  | THF                             | 74        | 21     |
| 4               | <b>C4</b>  | THF                             | 52        | 7      |
| 5               | <b>C5</b>  | THF                             | 37        | 3      |
| 6               | <b>C6</b>  | THF                             | 22        | 0      |
| 7               | <b>C7</b>  | THF                             | 76        | -55    |
| 8               | <b>C8</b>  | THF                             | 80        | -35    |
| 9               | <b>C9</b>  | THF                             | 80        | 40     |
| 10              | <b>C10</b> | THF                             | 50        | -19    |
| 11              | <b>C7</b>  | Toluene                         | 73        | -53    |
| 12              | <b>C7</b>  | MTBE                            | 67        | -33    |
| 13              | <b>C7</b>  | Et <sub>2</sub> O               | 89        | -15    |
| 14              | <b>C7</b>  | CH <sub>3</sub> CN              | 60        | -41    |
| 15              | <b>C7</b>  | CH <sub>2</sub> Cl <sub>2</sub> | 68        | -41    |
| 16 <sup>c</sup> | <b>C7</b>  | THF                             | 17        | -59    |
| 17 <sup>d</sup> | <b>C7</b>  | THF                             | trance    | -50    |
| 18 <sup>e</sup> | <b>C7</b>  | THF                             | 57        | -45    |

<sup>a</sup> Reaction conditions: **1a** (0.10 mmol, 1.0 equiv), Catalyst (0.01 mmol, 10 mol %), **Cl-1** (0.11 mmol, 1.1 equiv), **SCN-2** (0.11 mmol, 1.1 equiv), solvent (1.0 mL), T, overnight. <sup>b</sup> ee value was determined by chiral HPLC analysis on AD-H column (*n*-hexane/*iso*-propanol 90:10, v/v, 1.0 mL cm<sup>-1</sup>, 254 nm). <sup>c</sup> **Cl-2** (0.11 mmol, 1.1 equiv) was used. <sup>d</sup> **Cl-3** (0.11 mmol, 1.1 equiv) was used. <sup>e</sup> **Cl-4** (0.11 mmol, 1.1 equiv) was used.

#### 4. Spectral data of the products

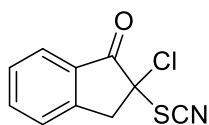

**2a**

**2-chloro-2-thiocyanato-2,3-dihydro-1H-inden-1-one (2a)**: colorless oil (20 mg, 90% yield).  $[\alpha]_D^{25} = -17.5$  (c 1.05, CH<sub>2</sub>Cl<sub>2</sub>). HPLC: on AD-H column (*n*-hexane/*iso*-propanol 90:10, v/v, 1.0 mL min<sup>-1</sup>, 254 nm),  $t_{\text{minor}} = 9.42$  min,  $t_{\text{major}} = 10.04$  min. <sup>1</sup>H NMR (400 MHz, CDCl<sub>3</sub>)  $\delta$ : 7.93 (d,  $J = 7.6$  Hz, 1H), 7.78 (t,  $J = 7.6$  Hz, 1H), 7.54 (t,  $J = 7.6$  Hz, 1H), 7.48 (d,  $J = 7.6$  Hz, 1H), 3.99 (s, 2H). <sup>13</sup>C{<sup>1</sup>H} NMR (100 MHz, CDCl<sub>3</sub>)  $\delta$ : 191.6, 147.2, 137.5, 130.5, 129.5, 126.7, 126.3, 107.9, 73.3, 46.6. IR (KBr): 2962, 2927, 2852, 2160, 1737, 1602, 1589, 1475, 1427, 1267 cm<sup>-1</sup>. HRMS (ESI)  $m/z$  calcd C<sub>10</sub>H<sub>7</sub>ClNOS for  $[M + H]^+$ : 223.9931, found: 223.9921.

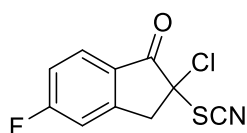

**2b**

**2-chloro-5-fluoro-2-thiocyanato-2,3-dihydro-1H-inden-1-one (2b)**: White solid (23 mg, 95% yield), mp: 113 – 115 °C. <sup>1</sup>H NMR (400 MHz, CDCl<sub>3</sub>)  $\delta$ : 7.96 (dd,  $J = 8.8, 5.2$  Hz, 1H), 7.23 (dd,  $J = 8.8, 2.0$  Hz, 1H), 7.16 (d,  $J = 8.0$  Hz, 1H),

3.99 (s, 2H).  $^{13}\text{C}\{^1\text{H}\}$  NMR (100 MHz,  $\text{CDCl}_3$ )  $\delta$ : 189.9, 168.6 (d,  $J = 260.4$  Hz), 150.3 (d,  $J = 10.7$  Hz), 129.3 (d,  $J = 10.8$  Hz), 126.9 (d,  $J = 1.9$  Hz), 118.1 (d,  $J = 23.8$  Hz), 113.3 (d,  $J = 23.3$  Hz), 107.7, 73.2, 46.5. IR (KBr): 2964, 2920, 2848, 2162, 1730, 1614, 1593, 1255  $\text{cm}^{-1}$ . HRMS (ESI)  $m/z$  calcd  $\text{C}_{10}\text{H}_6\text{ClFNOS}$  for  $[\text{M} + \text{H}]^+$ : 241.9837, found: 241.9836.

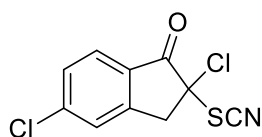

**2c**

**2,5-dichloro-2-thiocyanato-2,3-dihydro-1H-inden-1-one (2c):** White solid (24 mg, 89% yield), mp: 96 – 98 °C.  $^1\text{H}$  NMR (400 MHz,  $\text{CDCl}_3$ )  $\delta$ : 7.87 (d,  $J = 8.4$  Hz, 1H), 7.52 (d,  $J = 8.0$  Hz, 1H), 7.48 (s, 1H), 3.96 (s, 2H).  $^{13}\text{C}\{^1\text{H}\}$  NMR (100 MHz,  $\text{CDCl}_3$ )  $\delta$ : 190.3, 148.6, 144.4, 130.4, 129.0, 127.7, 126.5, 107.6, 73.0, 46.2. IR (KBr): 1960, 2926, 2852, 2162, 1747, 1732, 1598, 1575, 1423, 1317, 1261  $\text{cm}^{-1}$ . HRMS (ESI)  $m/z$  calcd  $\text{C}_{10}\text{H}_6\text{Cl}_2\text{NOS}$  for  $[\text{M} + \text{H}]^+$ : 257.9542, found: 257.9543.

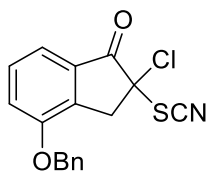

**2d**

**4-(benzyloxy)-2-chloro-2-thiocyanato-2,3-dihydro-1H-inden-1-one (2d):** White solid (31 mg, 94% yield), mp: 107 – 109 °C.  $^1\text{H}$  NMR (400 MHz,  $\text{CDCl}_3$ )  $\delta$ : 7.36 – 7.19 (m, 7H), 7.10 – 7.08 (m, 1H), 5.01 (s, 2H), 3.75 (d,  $J = 4.0$  Hz, 2H).  $^{13}\text{C}\{^1\text{H}\}$  NMR (100 MHz,  $\text{CDCl}_3$ )  $\delta$ : 191.8, 155.4, 136.4, 135.6, 131.9, 131.0, 128.8, 128.5, 127.4, 118.9, 119.1, 107.8, 73.1, 70.6, 43.6. IR (KBr): 2920, 2875, 2162, 1730, 1597, 1487, 1456, 1284, 1263  $\text{cm}^{-1}$ . HRMS (ESI)  $m/z$  calcd  $\text{C}_{17}\text{H}_{13}\text{ClNO}_2\text{S}$  for  $[\text{M} + \text{H}]^+$ : 330.0350, found: 330.0348.

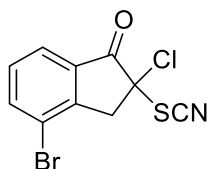

**2e**

**4-bromo-2-chloro-2-thiocyanato-2,3-dihydro-1H-inden-1-one (2e):** Yellow solid (21 mg, 66% yield), mp: 106 – 108 °C.  $^1\text{H}$  NMR (400 MHz,  $\text{CDCl}_3$ )  $\delta$ : 7.93 (d,  $J = 8.0$  Hz, 1H), 7.90 (d,  $J = 8.0$  Hz, 1H), 7.46 (t,  $J = 8.0$  Hz, 1H), 3.90 (m, 2H).  $^{13}\text{C}\{^1\text{H}\}$  NMR (100 MHz,  $\text{CDCl}_3$ )  $\delta$ : 191.0, 147.1, 140.1, 132.6, 131.1, 125.4, 121.4, 107.4, 72.5, 47.3. IR (KBr): 2958, 2924, 2158, 1747, 1728, 1595, 1456, 1259  $\text{cm}^{-1}$ . HRMS (ESI)  $m/z$  calcd  $\text{C}_{10}\text{H}_9\text{BrClN}_2\text{OS}$  for  $[\text{M} + \text{NH}_4]^+$ : 318.9302, found: 318.9303.

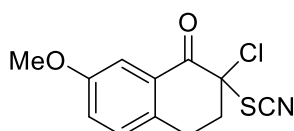

**2f**

**2-chloro-7-methoxy-2-thiocyanato-3,4-dihydronaphthalen-1(2H)-one (2f):** Colorless oil (23 mg, 86% yield).  $^1\text{H}$  NMR (400 MHz,  $\text{CDCl}_3$ )  $\delta$ : 7.53 (d,  $J = 2.8$  Hz, 1H), 7.24 – 7.18 (m, 2H), 3.85 (s, 3H), 3.40 – 3.31 (m, 1H), 3.21 – 3.16

(m, 1H), 3.05 – 2.99 (m, 1H), 2.88 – 2.80 (m, 1H).  $^{13}\text{C}\{^1\text{H}\}$  NMR (100 MHz,  $\text{CDCl}_3$ )  $\delta$ : 186.1, 159.1, 135.4, 130.2, 128.4, 124.3, 110.9, 109.5, 80.7, 56.7, 40.4, 26.2. IR (KBr): 3007, 2941, 2839, 2160, 1683, 1610, 1498, 1463, 1423, 1342, 1288, 1255  $\text{cm}^{-1}$ . HRMS (ESI)  $m/z$  calcd  $\text{C}_{12}\text{H}_{11}\text{ClNO}_2\text{S}$  for  $[\text{M} + \text{H}]^+$ : 268.0194, found: 268.0198.

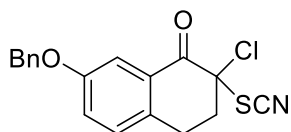

**2g**

**7-(benzyloxy)-2-chloro-2-thiocyanato-3,4-dihydronaphthalen-1(2H)-one (2g):** White solid (29 mg, 85% yield), mp: 206 – 108 °C.  $^1\text{H}$  NMR (400 MHz,  $\text{CDCl}_3$ )  $\delta$ : 7.63 (d,  $J = 2.4$  Hz, 1H), 7.44 – 7.33 (m, 5H), 7.28 – 7.21 (m, 2H), 5.10 (s, 2H), 3.40 – 3.32 (m, 1H), 3.21 – 3.16 (m, 1H), 3.05 – 2.99 (m, 1H), 2.88 – 2.80 (m, 1H).  $^{13}\text{C}\{^1\text{H}\}$  NMR (100 MHz,  $\text{CDCl}_3$ )  $\delta$ : 186.0, 158.2, 136.1, 135.6, 130.3, 128.7, 128.4, 128.3, 127.6, 124.8, 112.2, 109.4, 80.6, 70.4, 40.3, 28.2. IR (KBr): 2920, 2850, 2158, 1683, 1496  $\text{cm}^{-1}$ . HRMS (ESI)  $m/z$  calcd  $\text{C}_{18}\text{H}_{14}\text{ClNNaO}_2\text{S}$  for  $[\text{M} + \text{Na}]^+$ : 366.0326, found: 366.0334.

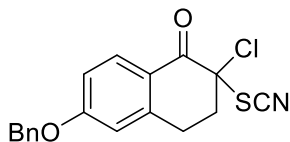

**2h**

**6-(benzyloxy)-2-chloro-2-thiocyanato-3,4-dihydronaphthalen-1(2H)-one (2h):** White solid (28 mg, 82% yield), mp: 124 – 126 °C.  $^1\text{H}$  NMR (400 MHz,  $\text{CDCl}_3$ )  $\delta$ : 8.04 (d,  $J = 8.8$  Hz, 1H), 7.40 – 7.34 (m, 5H), 6.97 (dd,  $J = 8.8, 2.4$  Hz, 1H), 6.80 (s, 1H), 5.13 (s, 2H), 3.41 – 3.33 (m, 1H), 3.17 – 3.11 (m, 1H), 3.02 – 2.95 (m, 1H), 2.85 – 2.77 (m, 1H).  $^{13}\text{C}\{^1\text{H}\}$  NMR (100 MHz,  $\text{CDCl}_3$ )  $\delta$ : 184.7, 164.4, 145.5, 135.5, 132.2, 128.8, 128.5, 127.4, 120.9, 115.4, 113.6, 109.8, 80.9, 70.4, 40.2, 27.2. IR (KBr): 3089, 3064, 3034, 2926, 2868, 2158, 1674, 1597, 1454, 1352, 1273, 1224  $\text{cm}^{-1}$ . HRMS (ESI)  $m/z$  calcd  $\text{C}_{18}\text{H}_{15}\text{ClNO}_2\text{S}$  for  $[\text{M} + \text{H}]^+$ : 344.0507, found: 344.0498.

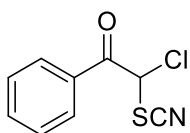

**2i**

**2-chloro-1-phenyl-2-thiocyanatoethan-1-one (2i):** Yellow oil (16 mg, 76% yield).  $^1\text{H}$  NMR (400 MHz,  $\text{CDCl}_3$ )  $\delta$ : 8.01 (d,  $J = 7.2$  Hz, 2H), 7.72 (t,  $J = 7.6$  Hz, 1H), 7.57 (t,  $J = 8.0$  Hz, 2H), 6.76 (s, 1H).  $^{13}\text{C}\{^1\text{H}\}$  NMR (100 MHz,  $\text{CDCl}_3$ )  $\delta$ : 189.7, 135.6, 130.6, 130.0, 129.3, 101.2, 61.4. IR (KBr): 2958, 2926, 2164, 1732, 1681, 1456, 1274  $\text{cm}^{-1}$ . HRMS (ESI)  $m/z$  calcd  $\text{C}_9\text{H}_7\text{ClNOS}$  for  $[\text{M} + \text{H}]^+$ : 211.9931, found: 211.9934.

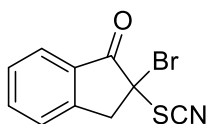

**2j**

**2-bromo-2-thiocyanato-2,3-dihydro-1H-inden-1-one (2j):** Colorless oil (25 mg, 92% yield).  $^1\text{H}$  NMR (400 MHz,  $\text{CDCl}_3$ )  $\delta$ : 7.94 (d,  $J = 8.0$  Hz, 1H), 7.77 (dt,  $J = 7.6, 0.8$  Hz, 1H), 7.54 (t,  $J = 7.2$  Hz, 1H), 7.47 (d,  $J = 8.0$  Hz, 1H), 4.18 – 4.06 (m, 2H).  $^{13}\text{C}\{^1\text{H}\}$  NMR (100 MHz,  $\text{CDCl}_3$ )  $\delta$ : 192.3, 147.3, 137.4, 130.2, 129.4, 126.6, 126.2, 108.7, 61.5, 48.0. IR (KBr): 2962, 2924, 2854, 2160, 1732, 1604, 1263  $\text{cm}^{-1}$ . HRMS (ESI)  $m/z$  calcd  $\text{C}_{10}\text{H}_7\text{BrNOS}$  for  $[\text{M} + \text{H}]^+$ : 267.9426, found:

267.9427.

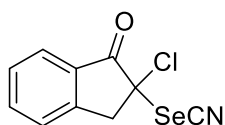

**4a**

**2-chloro-2-selenocyanato-2,3-dihydro-1H-inden-1-one (4a):** Colorless oil (22 mg, 81% yield).  $^1\text{H}$  NMR (400 MHz,  $\text{CDCl}_3$ )  $\delta$ : 7.93 (d,  $J = 8.0$  Hz, 1H), 7.77 (t,  $J = 7.2$  Hz, 1H), 7.53 (t,  $J = 7.2$  Hz, 1H), 7.47 (d,  $J = 7.6$  Hz, 1H), 4.19 – 4.01 (m, 2H).  $^{13}\text{C}\{^1\text{H}\}$  NMR (100 MHz,  $\text{CDCl}_3$ )  $\delta$ : 193.2, 147.6, 137.5, 130.4, 129.4, 126.5, 126.2, 99.7, 69.4, 47.5. IR (KBr): 2962, 2926, 2852, 2156, 1737, 1716, 1602, 1261  $\text{cm}^{-1}$ . HRMS (ESI)  $m/z$  calcd  $\text{C}_{10}\text{H}_7\text{ClNOSe}$  for  $[\text{M} + \text{H}]^+$ : 271.9376, found: 271.9378.

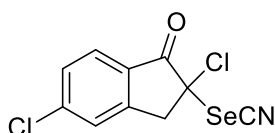

**4b**

**2,5-dichloro-2-selenocyanato-2,3-dihydro-1H-inden-1-one (4b):** White solid (21 mg, 70% yield), mp: 87 – 89 °C.  $^1\text{H}$  NMR (400 MHz,  $\text{CDCl}_3$ )  $\delta$ : 7.86 (d,  $J = 8.4$  Hz, 1H), 7.51 (dt,  $J = 8.4, 1.2$  Hz, 1H), 7.48 (s, 1H), 4.17 – 3.99 (m, 2H).  $^{13}\text{C}\{^1\text{H}\}$  NMR (100 MHz,  $\text{CDCl}_3$ )  $\delta$ : 191.9, 148.9, 144.4, 130.3, 128.8, 127.5, 126.4, 99.5, 68.8, 47.1. IR (KBr): 2958, 2926, 2852, 2156, 1737, 1716, 1597, 1575, 1319, 1261, 1207  $\text{cm}^{-1}$ . HRMS (ESI)  $m/z$  calcd  $\text{C}_{10}\text{H}_6\text{Cl}_2\text{NOSe}$  for  $[\text{M} + \text{H}]^+$ : 305.8986, found: 305.8985.

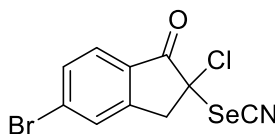

**4c**

**5-bromo-2-chloro-2-selenocyanato-2,3-dihydro-1H-inden-1-one (4c):** Yellow solid (27 mg, 77% yield), mp: 111 – 113 °C.  $^1\text{H}$  NMR (400 MHz,  $\text{CDCl}_3$ )  $\delta$ : 7.78 (d,  $J = 14.8$  Hz, 1H), 7.69 – 7.66 (m, 2H), 4.17 – 3.99 (m, 2H).  $^{13}\text{C}\{^1\text{H}\}$  NMR (100 MHz,  $\text{CDCl}_3$ )  $\delta$ : 192.2, 148.9, 133.3, 133.2, 129.5, 129.2, 127.5, 99.4, 68.7, 47.0. IR (KBr): 2924, 2850, 2156, 1716, 1591, 1417  $\text{cm}^{-1}$ . HRMS (ESI)  $m/z$  calcd  $\text{C}_{10}\text{H}_5\text{BrClNaOSe}$  for  $[\text{M} + \text{Na}]^+$ : 371.8300, found: 371.8301.

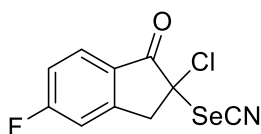

**4d**

**2-chloro-5-fluoro-2-selenocyanato-2,3-dihydro-1H-inden-1-one (4d):** Yellow solid (22 mg, 76% yield), mp: 113 – 115 °C.  $^1\text{H}$  NMR (400 MHz,  $\text{CDCl}_3$ )  $\delta$ : 7.96 (dd,  $J = 8.4, 5.2$  Hz, 1H), 7.26 – 7.21 (m, 1H), 7.15 (d,  $J = 8.0$  Hz, 1H), 4.20 – 4.01 (m, 2H).  $^{13}\text{C}\{^1\text{H}\}$  NMR (100 MHz,  $\text{CDCl}_3$ )  $\delta$ : 191.5, 168.7 (d,  $J = 260.3$  Hz), 150.7 (d,  $J = 10.7$  Hz), 129.2 (d,  $J = 10.8$  Hz), 126.8 (d,  $J = 1.9$  Hz), 118.0 (d,  $J = 23.8$  Hz), 113.2 (d,  $J = 23.2$  Hz), 99.5, 69.8, 47.4. IR (KBr): 2960, 2926, 2852, 2156, 1732, 1716, 1614, 1593, 1259  $\text{cm}^{-1}$ . HRMS (ESI)  $m/z$  calcd  $\text{C}_{10}\text{H}_6\text{ClFNOSe}$  for  $[\text{M} + \text{H}]^+$ : 289.9282, found: 289.9278.



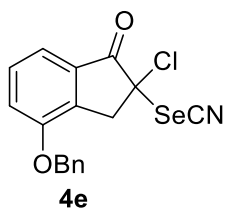

**4-(benzyloxy)-2-chloro-2-selenocyanato-2,3-dihydro-1H-inden-1-one (4e):** White solid (35 mg, 93% yield), mp: 153 – 155 °C.  $^1\text{H}$  NMR (400 MHz,  $\text{CDCl}_3$ )  $\delta$ : 7.53 – 7.37 (m, 7H), 7.25 (d,  $J$  = 8.4 Hz, 1H), 5.18 (s, 2H), 4.12 – 3.93 (m, 2H).  $^{13}\text{C}\{^1\text{H}\}$  NMR (100 MHz,  $\text{CDCl}_3$ )  $\delta$ : 193.4, 155.4, 136.7, 135.7, 131.7, 130.9, 128.8, 128.5, 127.4, 118.9, 118.0, 99.6, 70.6, 69.3, 44.3. IR (KBr): 2954, 2920, 2850, 2156, 1732, 1716, 1267  $\text{cm}^{-1}$ . HRMS (ESI)  $m/z$  calcd  $\text{C}_{17}\text{H}_{13}\text{ClNO}_2\text{Se}$  for  $[\text{M} + \text{H}]^+$ : 377.9795, found: 377.9794.

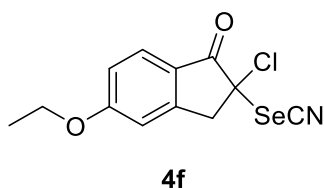

**5-(allyloxy)-2-chloro-2-selenocyanato-2,3-dihydro-1H-inden-1-one (4f):** White solid (19 mg, 60% yield), mp: 87 – 89 °C.  $^1\text{H}$  NMR (400 MHz,  $\text{CDCl}_3$ )  $\delta$ : 7.84 (d,  $J$  = 8.8 Hz, 1H), 7.05 (dd,  $J$  = 8.8, 2.0 Hz, 1H), 6.87 (s, 1H), 6.08 – 6.01 (m, 1H), 5.47 – 5.35 (m, 2H), 4.66 (d,  $J$  = 5.2 Hz, 2H), 4.18 – 3.97 (m, 2H).  $^{13}\text{C}\{^1\text{H}\}$  NMR (100 MHz,  $\text{CDCl}_3$ )  $\delta$ : 191.4, 166.5, 150.8, 131.7, 128.4, 123.1, 118.8, 118.0, 110.1, 100.0, 70.2, 69.5, 47.8. IR (KBr): 2962, 2926, 2156, 1716, 1597, 1489, 1261  $\text{cm}^{-1}$ . HRMS (ESI)  $m/z$  calcd  $\text{C}_{13}\text{H}_{11}\text{ClNO}_2\text{Se}$  for  $[\text{M} + \text{H}]^+$ : 327.9638, found: 327.9633.

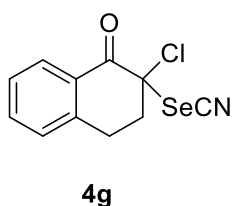

**2-chloro-2-selenocyanato-3,4-dihydronaphthalen-1(2H)-one (4g):** Colorless oil (28 mg, 96% yield).  $^1\text{H}$  NMR (400 MHz,  $\text{CDCl}_3$ )  $\delta$ : 8.08 (dd,  $J$  = 8.0, 1.2 Hz, 1H), 7.62 (dt,  $J$  = 7.6, 1.2 Hz, 1H), 7.42 (t,  $J$  = 7.6 Hz, 1H), 7.32 (d,  $J$  = 7.6 Hz, 1H), 3.51 – 3.43 (m, 1H), 3.30 – 3.24 (m, 1H), 3.09 – 2.98 (m, 2H).  $^{13}\text{C}\{^1\text{H}\}$  NMR (100 MHz,  $\text{CDCl}_3$ )  $\delta$ : 188.5, 143.2, 135.6, 129.4, 129.0, 127.7, 127.4, 101.7, 78.4, 41.5, 27.4. IR (KBr): 2956, 2924, 2852, 2156, 1734, 1676, 1456, 1274  $\text{cm}^{-1}$ . HRMS (ESI)  $m/z$  calcd  $\text{C}_{11}\text{H}_9\text{ClNOSe}$  for  $[\text{M} + \text{H}]^+$ : 285.9532, found: 285.9530.

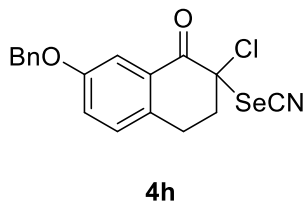

**7-(benzyloxy)-2-chloro-2-selenocyanato-3,4-dihydronaphthalen-1(2H)-one (4h):** White solid (37 mg, 93% yield), mp: 90 – 92 °C.  $^1\text{H}$  NMR (400 MHz,  $\text{CDCl}_3$ )  $\delta$ : 7.52 (d,  $J$  = 2.4 Hz, 1H), 7.37 – 7.25 (m, 5H), 7.20 – 7.10 (m, 2H), 5.02 (s, 2H), 3.34 – 3.26 (m, 1H), 3.20 – 3.14 (m, 1H), 2.97 – 2.82 (m, 2H).  $^{13}\text{C}\{^1\text{H}\}$  NMR (100 MHz,  $\text{CDCl}_3$ )  $\delta$ : 188.4, 158.1, 136.1, 136.0, 130.3, 128.7, 128.3, 128.1, 127.5, 124.8, 112.1, 101.7, 78.4, 70.4, 41.8, 26.8. IR (KBr): 2920, 2850, 2156, 1732, 1716, 1267  $\text{cm}^{-1}$ . HRMS (ESI)  $m/z$  calcd  $\text{C}_{18}\text{H}_{15}\text{ClNO}_2\text{Se}$  for  $[\text{M} + \text{H}]^+$ : 391.9951, found: 391.9947.

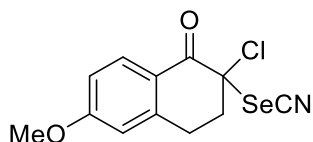

4i

**2-chloro-6-methoxy-2-selenocyanato-3,4-dihydronaphthalen-1(2H)-one (4i):** White solid (30 mg, 97% yield), mp: 117 – 119 °C.  $^1\text{H}$  NMR (400 MHz,  $\text{CDCl}_3$ )  $\delta$ : 8.04 (d,  $J = 8.8$  Hz, 1H), 6.92 (dd,  $J = 8.8, 2.4$  Hz, 1H), 6.74 (d,  $J = 2.0$  Hz, 1H), 3.09 (s, 3H), 3.48 – 3.40 (m, 1H), 3.26 – 3.21 (m, 1H), 3.06 – 2.92 (m, 2H).  $^{13}\text{C}\{^1\text{H}\}$  NMR (100 MHz,  $\text{CDCl}_3$ )  $\delta$ : 187.2, 165.5, 146.1, 132.1, 120.4, 114.8, 112.7, 102.1, 78.8, 55.7, 41.7, 27.9. IR (KBr): 2960, 2924, 2843, 2158, 1732, 1687, 1456, 1274  $\text{cm}^{-1}$ . HRMS (ESI)  $m/z$  calcd  $\text{C}_{12}\text{H}_{11}\text{ClNO}_2\text{Se}$  for  $[\text{M} + \text{H}]^+$ : 315.9638, found: 315.9642.

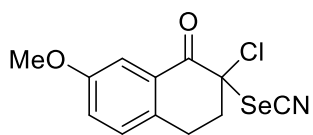

4j

**2-chloro-7-methoxy-2-selenocyanato-3,4-dihydronaphthalen-1(2H)-one (4j):** Colorless oil (31 mg, 99% yield).  $^1\text{H}$  NMR (400 MHz,  $\text{CDCl}_3$ )  $\delta$ : 7.50 (d,  $J = 2.4$  Hz, 1H), 7.24 – 7.18 (m, 2H), 3.85 (s, 3H), 3.42 – 3.34 (m, 1H), 3.27 – 3.22 (m, 1H), 3.06 – 2.91 (m, 2H).  $^{13}\text{C}\{^1\text{H}\}$  NMR (100 MHz,  $\text{CDCl}_3$ )  $\delta$ : 188.5, 159.0, 135.9, 130.2, 128.1, 124.3, 110.8, 101.7, 78.4, 55.6, 41.8, 26.7. IR (KBr): 2931, 2837, 2156, 1678, 1610, 1496, 1432, 1340, 1288  $\text{cm}^{-1}$ . HRMS (ESI)  $m/z$  calcd  $\text{C}_{12}\text{H}_{11}\text{ClNO}_2\text{Se}$  for  $[\text{M} + \text{H}]^+$ : 315.9638, found: 315.9641.

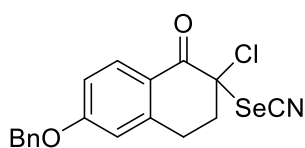

4k

**6-(benzyloxy)-2-chloro-2-selenocyanato-3,4-dihydronaphthalen-1(2H)-one (4k):** Pink solid (39 mg, 99% yield), mp: 141 – 143 °C.  $^1\text{H}$  NMR (400 MHz,  $\text{CDCl}_3$ )  $\delta$ : 8.05 (d,  $J = 8.8$  Hz, 1H), 7.43 – 7.36 (m, 5H), 7.99 (dd,  $J = 8.8, 2.4$  Hz, 1H), 6.83 (d,  $J = 2.0$  Hz, 1H), 5.16 (s, 2H), 3.47 – 3.39 (m, 1H), 3.25 – 3.20 (m, 1H), 3.05 – 2.90 (m, 2H).  $^{13}\text{C}\{^1\text{H}\}$  NMR (100 MHz,  $\text{CDCl}_3$ )  $\delta$ : 187.1, 164.5, 146.0, 135.5, 132.1, 128.8, 128.4, 127.4, 120.6, 115.4, 113.7, 102.1, 78.8, 70.4, 41.6, 27.8. IR (KBr): 2926, 2870, 2154, 1668, 1595, 1350, 1267, 1222  $\text{cm}^{-1}$ . HRMS (ESI)  $m/z$  calcd  $\text{C}_{18}\text{H}_{15}\text{ClNO}_2\text{Se}$  for  $[\text{M} + \text{H}]^+$ : 391.9951, found: 391.9946.

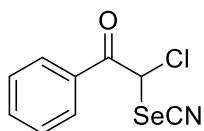

4l

**2-chloro-1-phenyl-2-selenocyanatoethan-1-one (4l):** White solid (26 mg, 99% yield), mp: 76 – 78 °C.  $^1\text{H}$  NMR (400 MHz,  $\text{CDCl}_3$ )  $\delta$ : 8.01 (d,  $J = 7.6$  Hz, 2H), 7.72 (t,  $J = 7.2$  Hz, 1H), 7.56 (t,  $J = 7.6$  Hz, 2H), 7.01 (s, 1H).  $^{13}\text{C}\{^1\text{H}\}$  NMR (100 MHz,  $\text{CDCl}_3$ )  $\delta$ : 187.3, 135.5, 130.9, 129.7, 129.3, 109.5, 65.6. IR (KBr): 3064, 2972, 2158, 1674, 1595, 1448, 1282  $\text{cm}^{-1}$ . HRMS (ESI)  $m/z$  calcd  $\text{C}_9\text{H}_7\text{ClNOSe}$  for  $[\text{M} + \text{H}]^+$ : 259.9376, found: 259.9374.

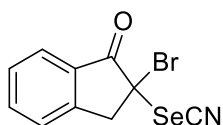

**4m**

**2-bromo-2-selenocyanato-2,3-dihydro-1H-inden-1-one (4m):** White solid (17 mg, 55% yield), mp: 77 – 79 °C.  $^1\text{H}$  NMR (400 MHz,  $\text{CDCl}_3$ )  $\delta$ : 7.94 (d,  $J = 8.0$  Hz, 1H), 7.77 (t,  $J = 7.6$  Hz, 1H), 7.53 (t,  $J = 7.6$  Hz, 1H), 7.47 (d,  $J = 7.6$  Hz, 1H), 4.24 (m, 2H).  $^{13}\text{C}\{^1\text{H}\}$  NMR (100 MHz,  $\text{CDCl}_3$ )  $\delta$ : 194.0, 147.9, 137.4, 129.9, 129.3, 126.5, 126.2, 100.7, 55.9, 48.8. IR (KBr): 2922, 2850, 2154, 1716, 1602, 1263  $\text{cm}^{-1}$ . HRMS (ESI)  $m/z$  calcd  $\text{C}_{10}\text{H}_6\text{BrNNaOSe}$  for  $[\text{M} + \text{Na}]^+$ : 337.8690, found: 337.8695.

5. Copies of HPLC chromatograms

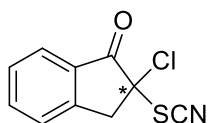

**2a**

**2-chloro-2-thiocyanato-2,3-dihydro-1H-inden-1-one (2a)**

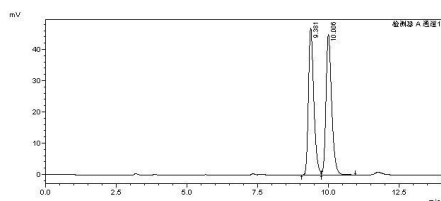

| Peak  | Time   | Area    | Area/%  |
|-------|--------|---------|---------|
| 1     | 9.381  | 618550  | 49.714  |
| 2     | 10.006 | 625673  | 50.286  |
| total |        | 1244223 | 100.000 |

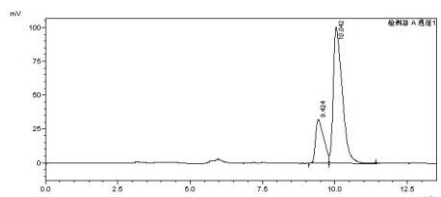

| Peak  | Time   | Area    | Area/%  |
|-------|--------|---------|---------|
| 1     | 9.424  | 630949  | 22.453  |
| 2     | 10.042 | 2179138 | 77.547  |
| total |        | 2810087 | 100.000 |

6. Copies of  $^1\text{H}$  and  $^{13}\text{C}\{^1\text{H}\}$  NMR spectra.

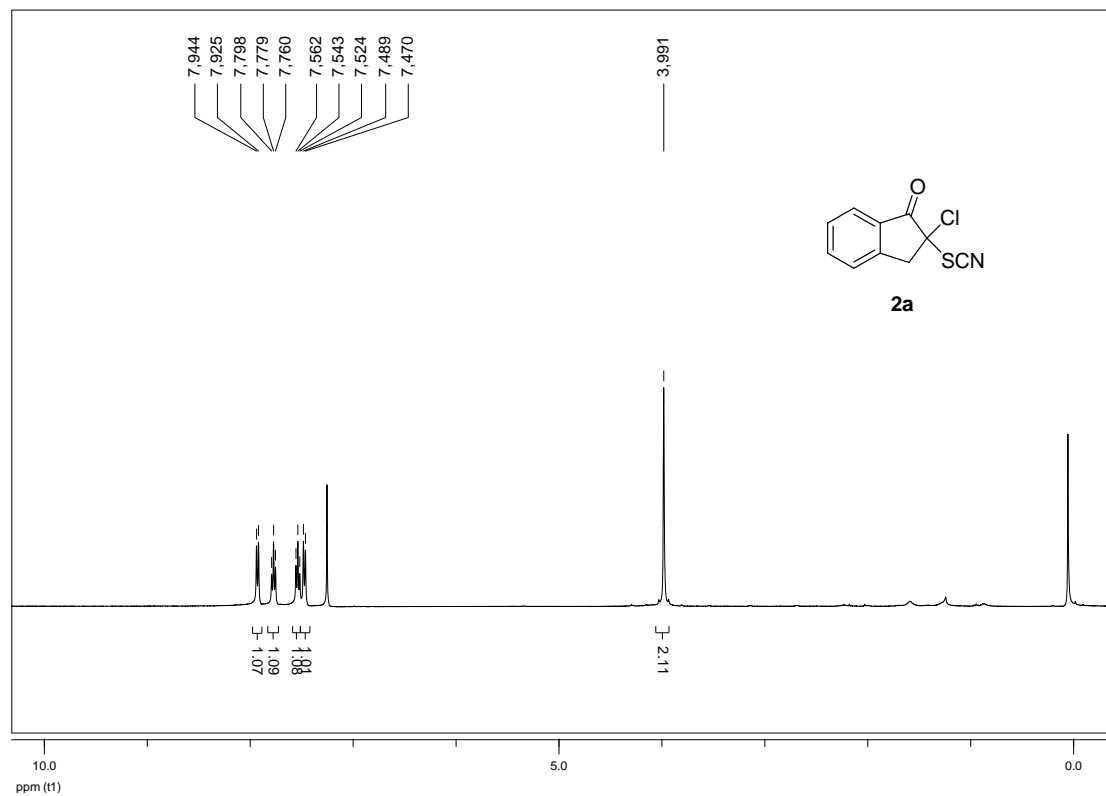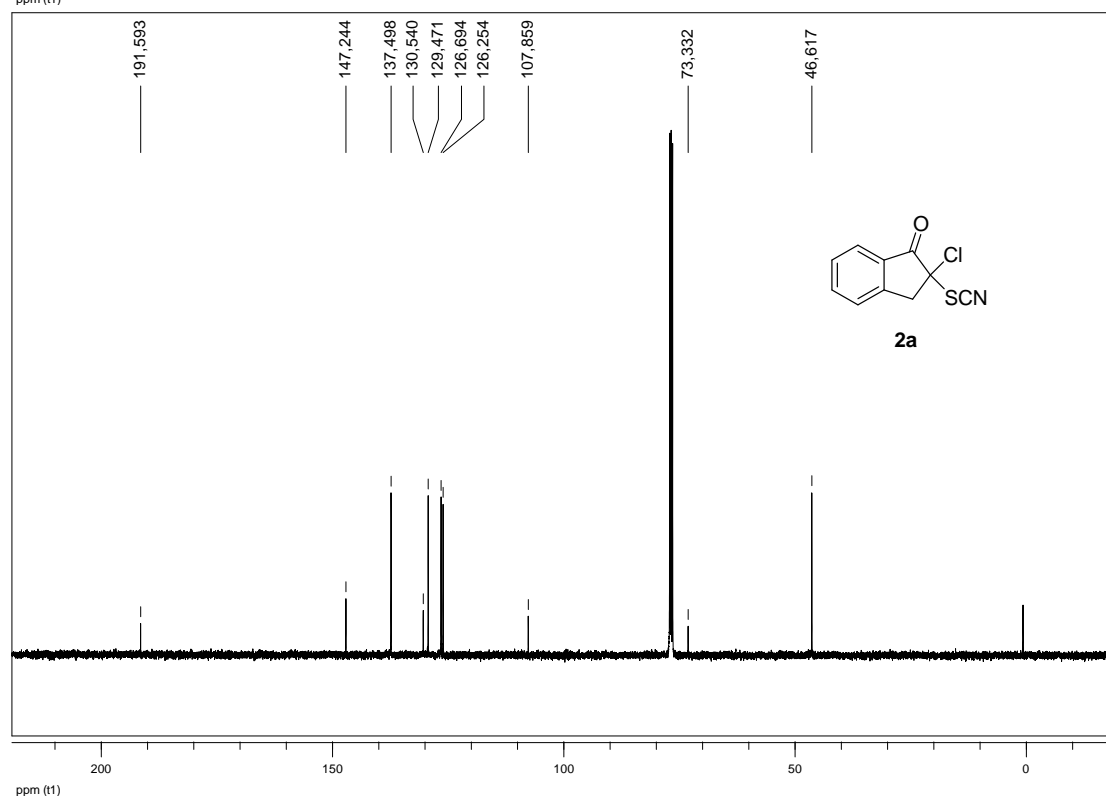

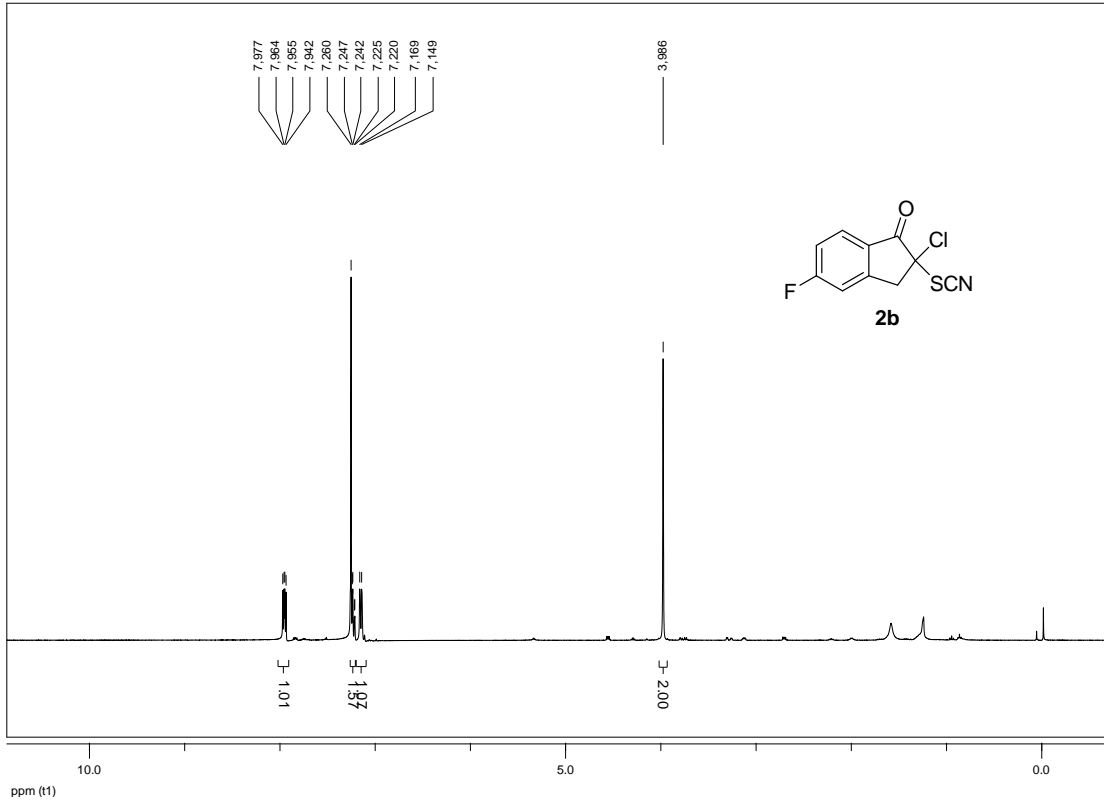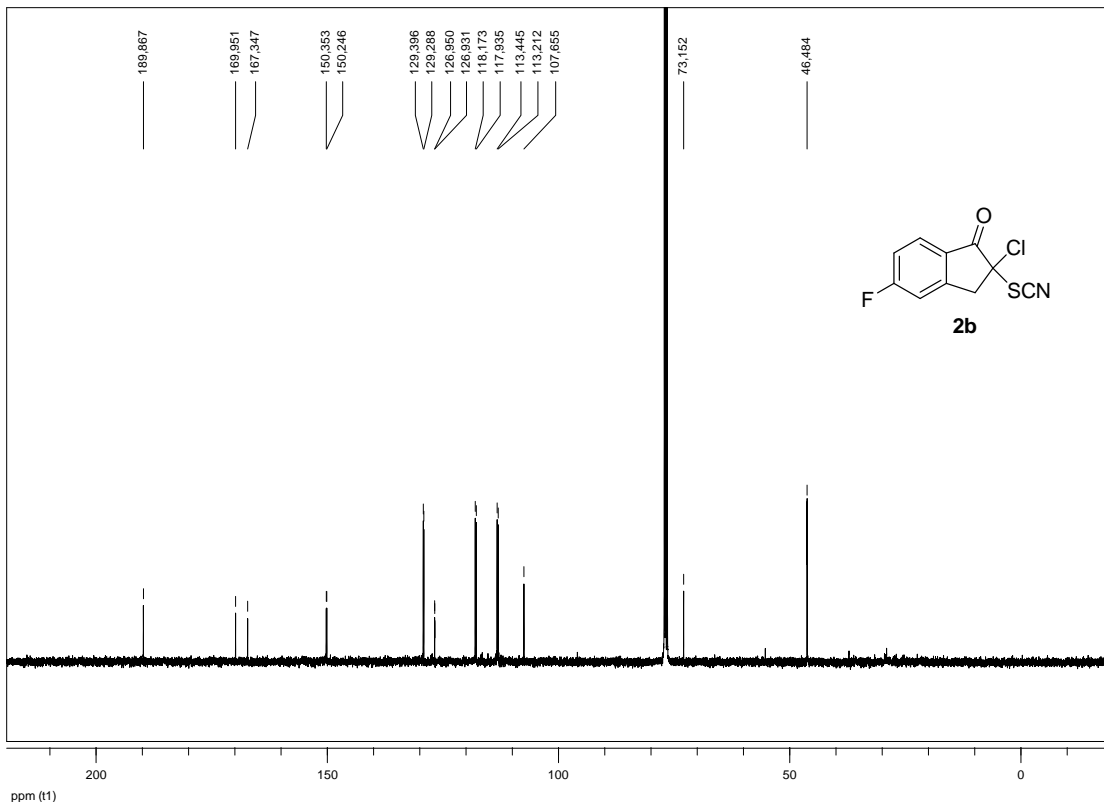

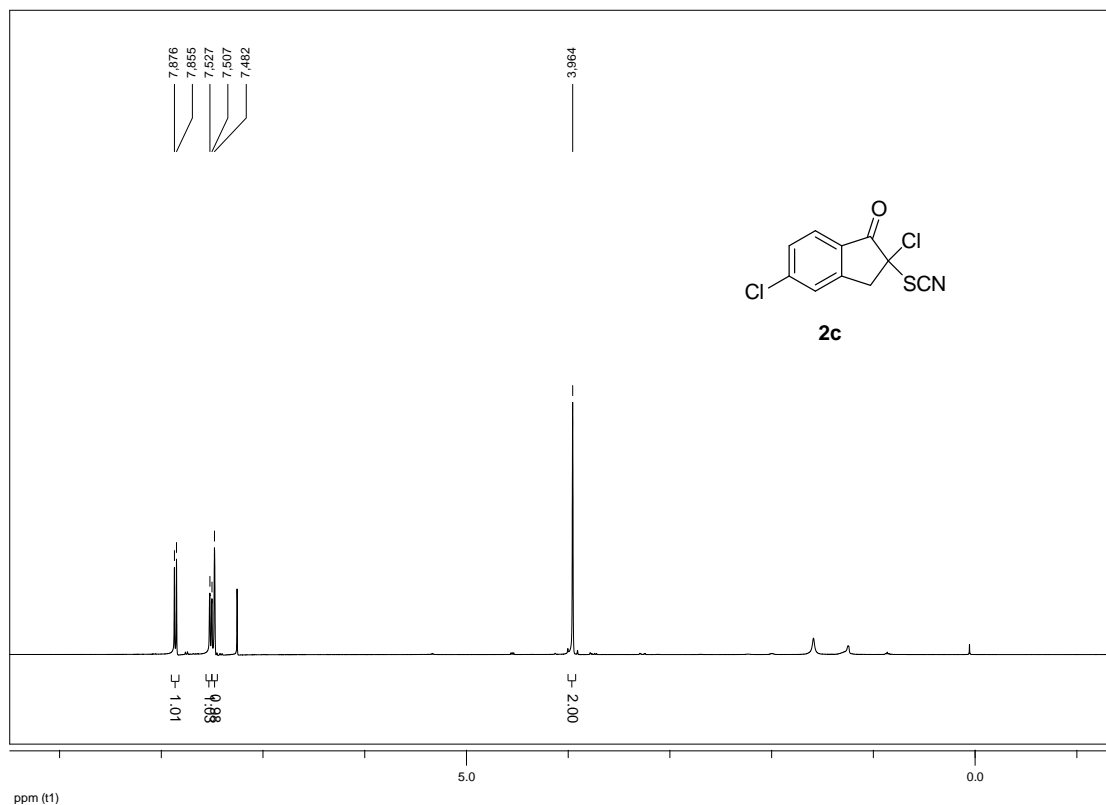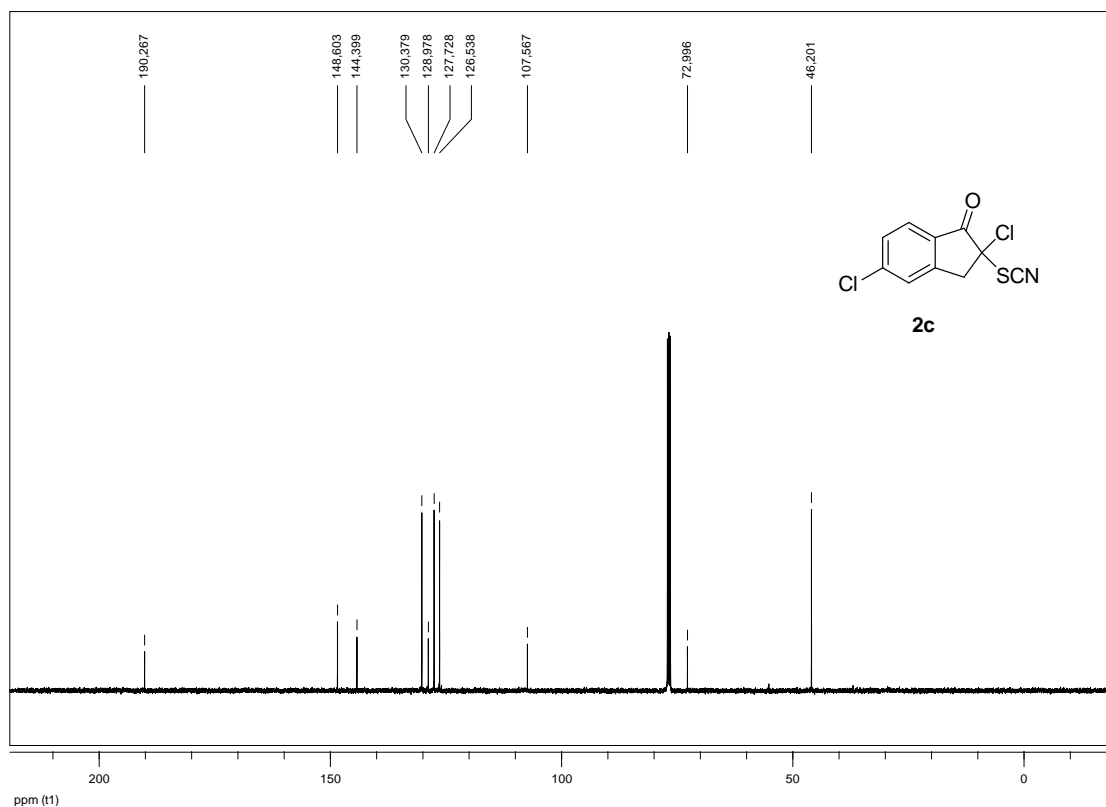

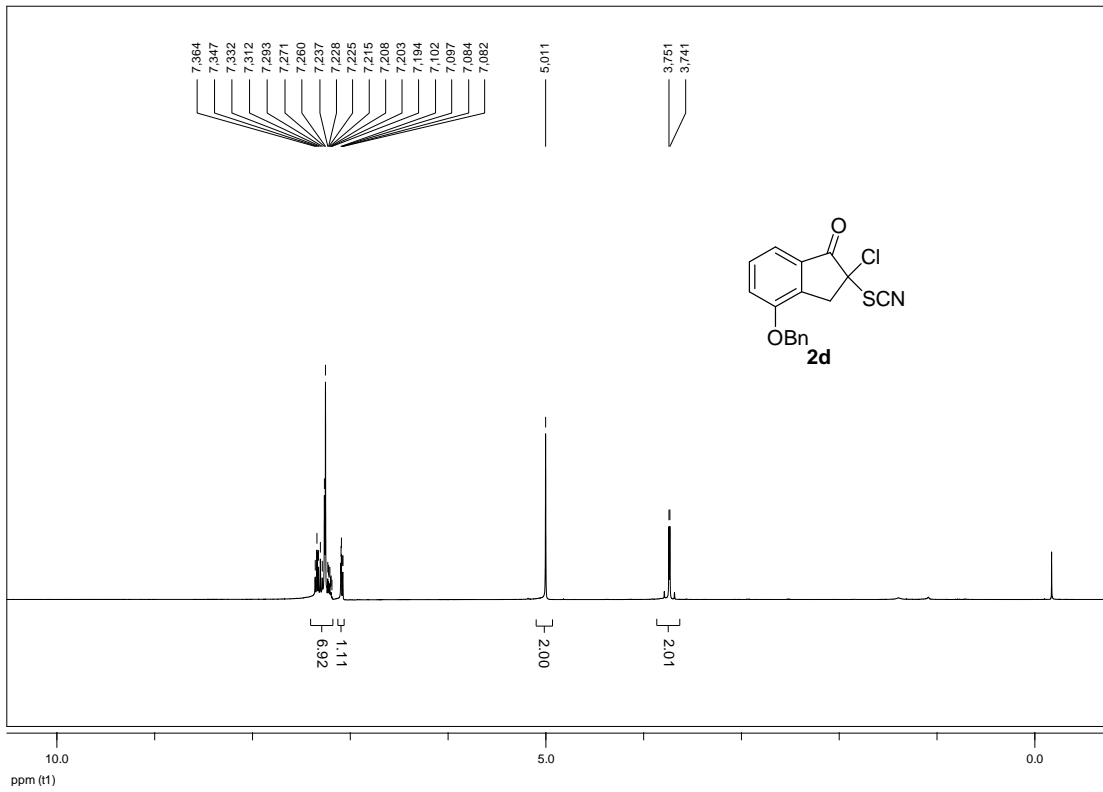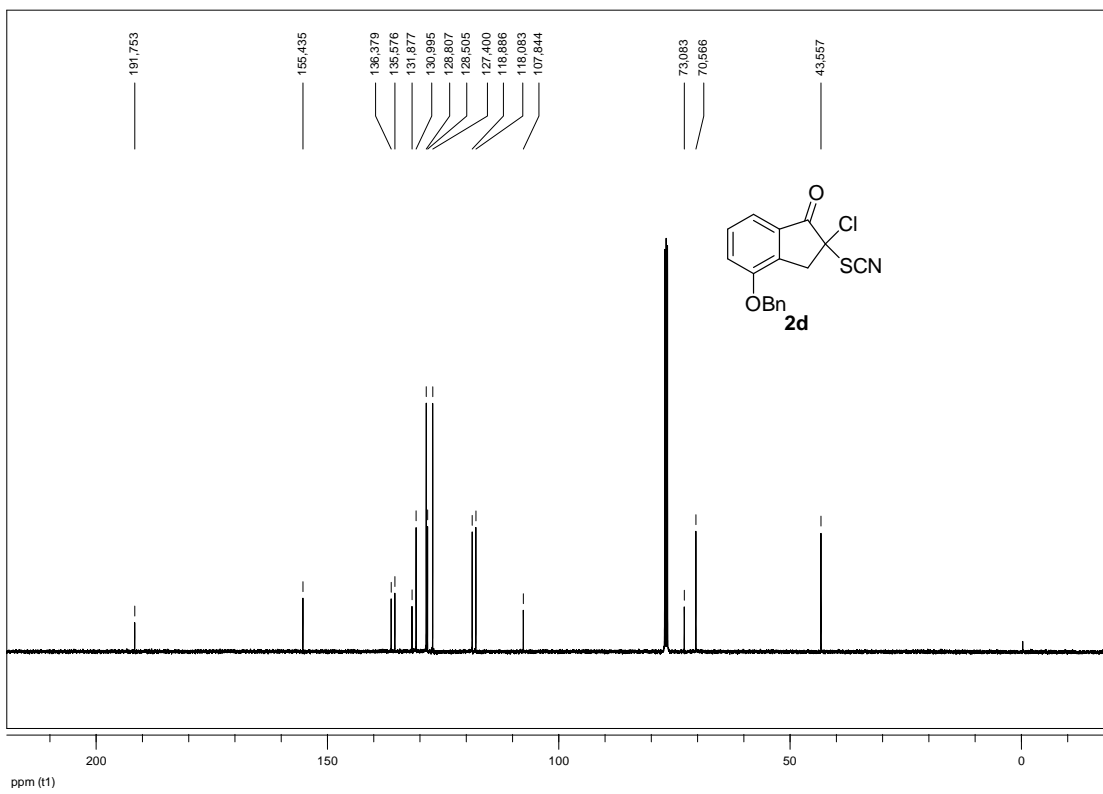

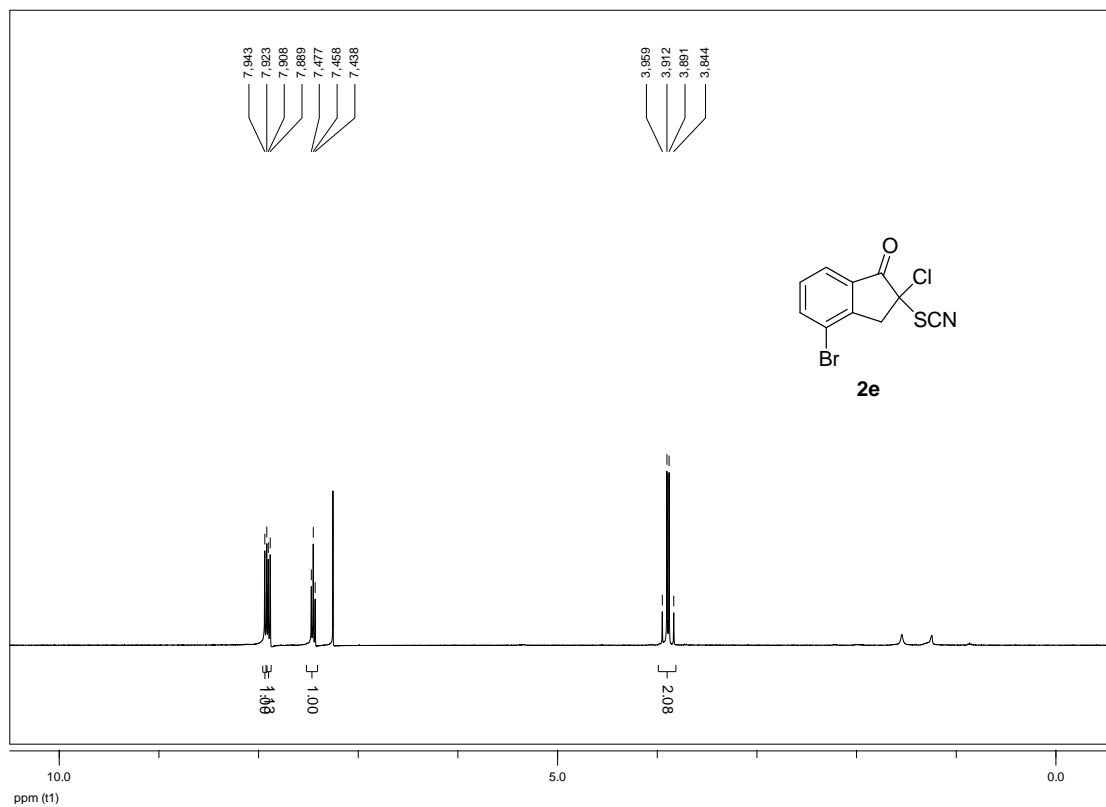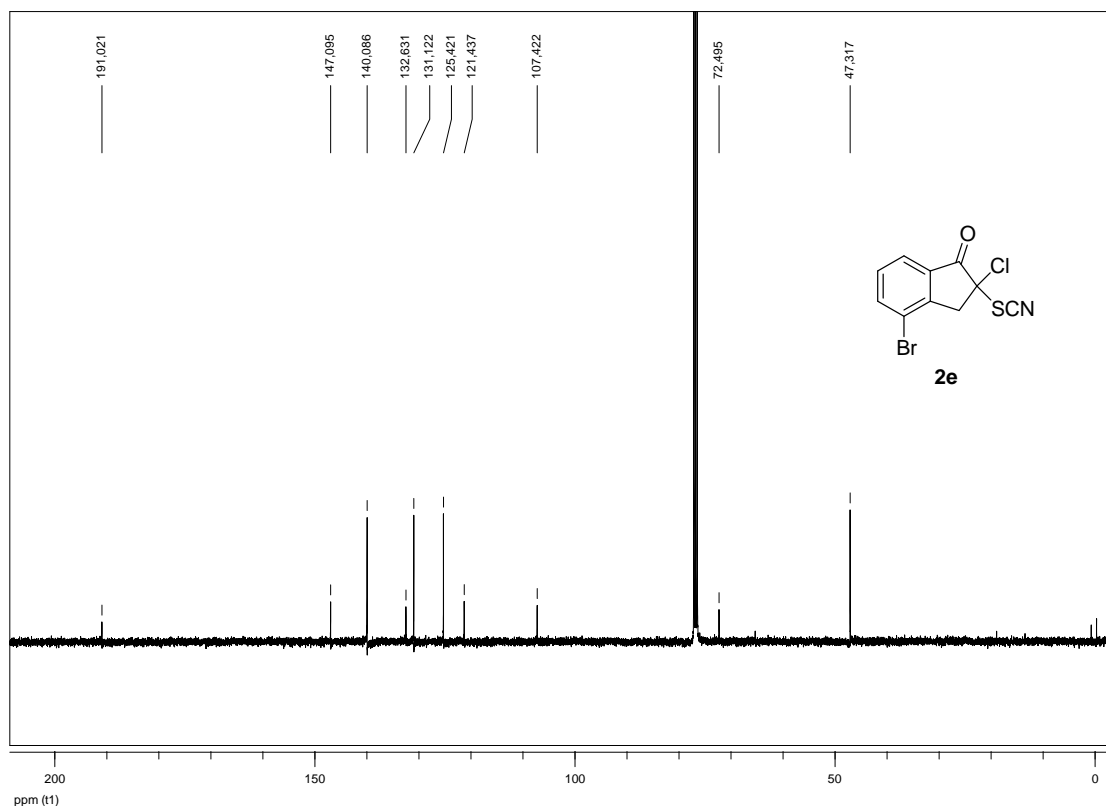



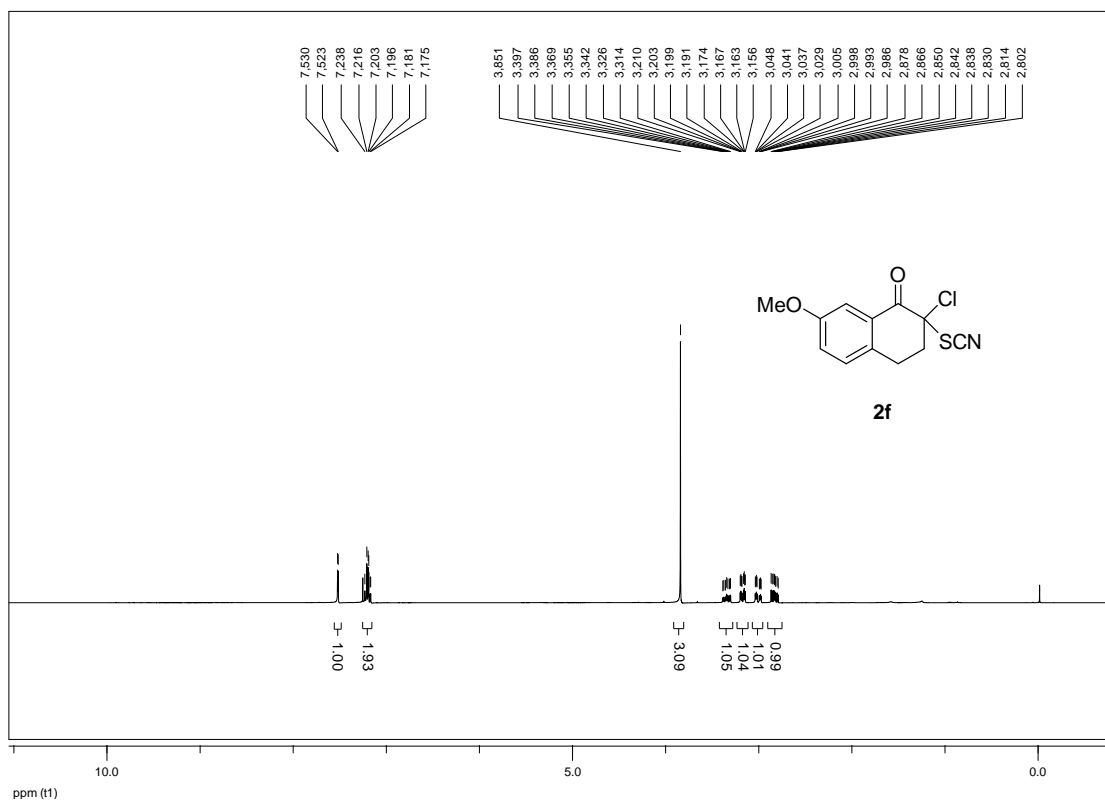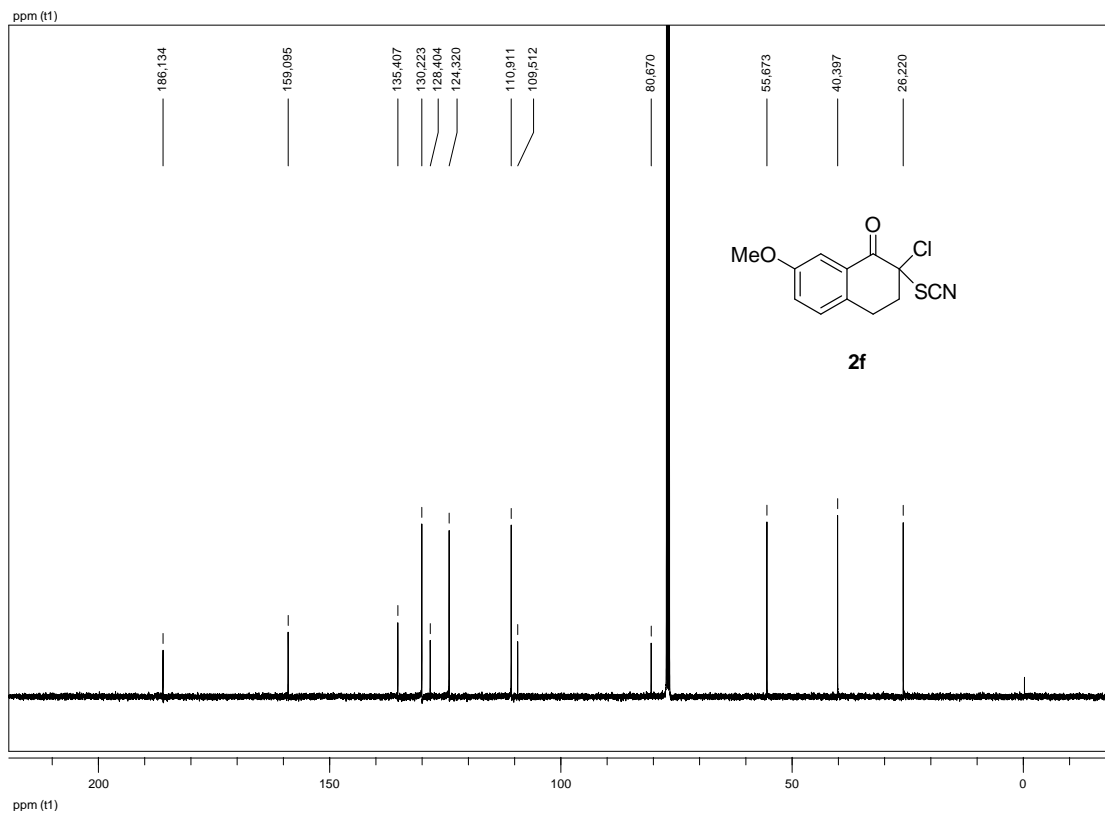

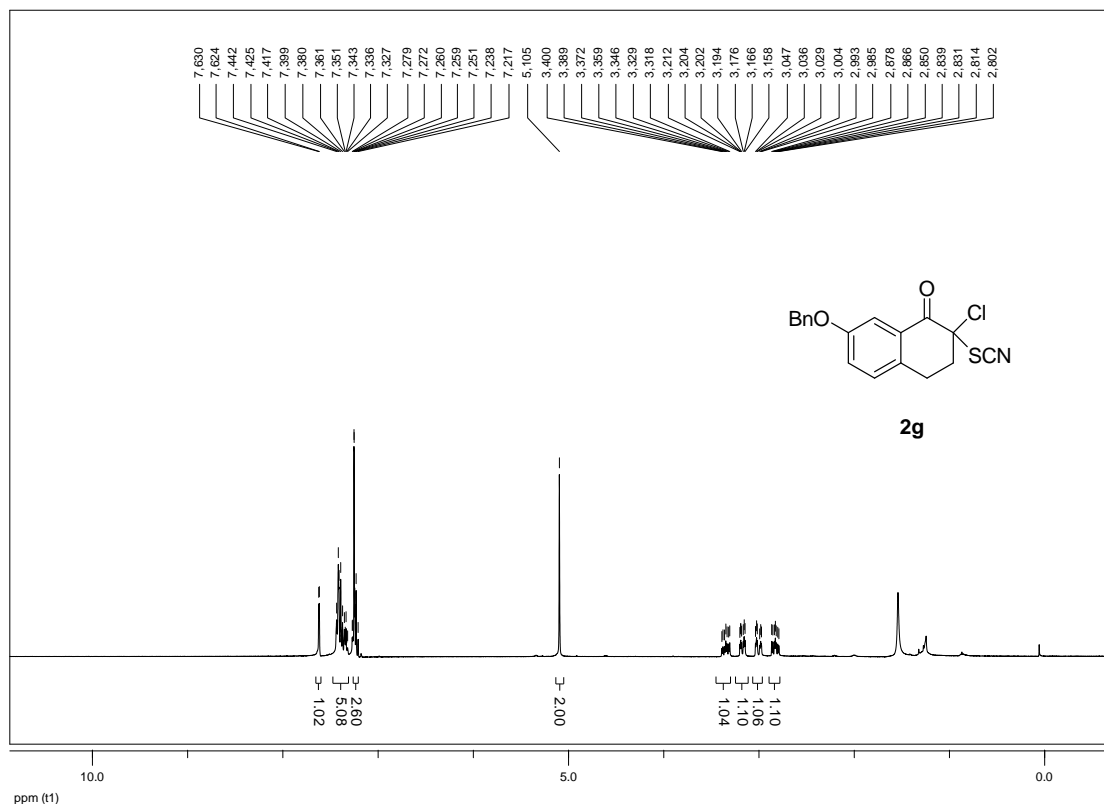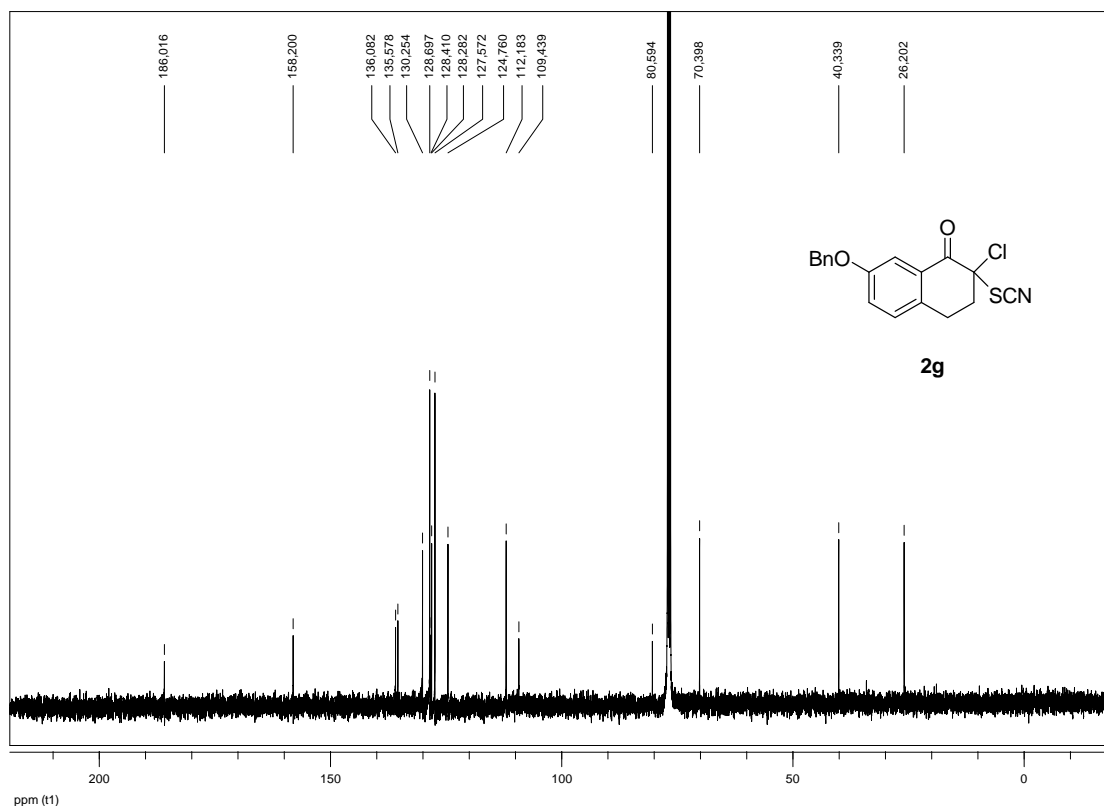

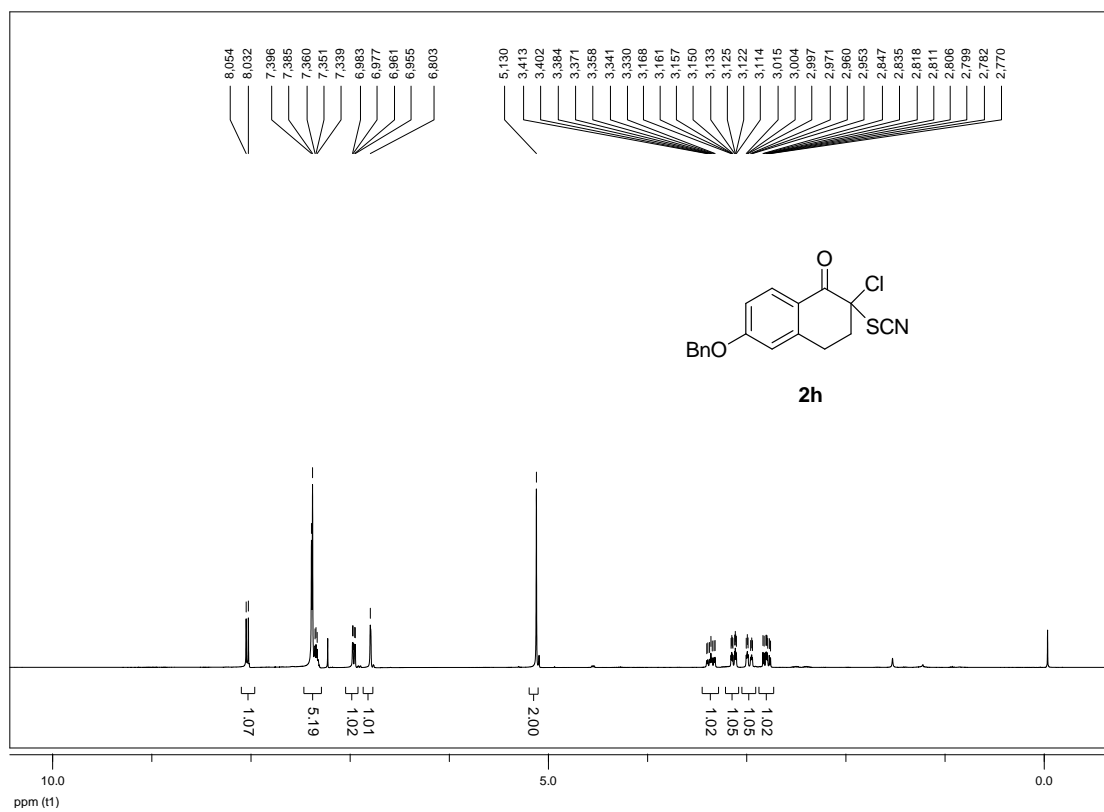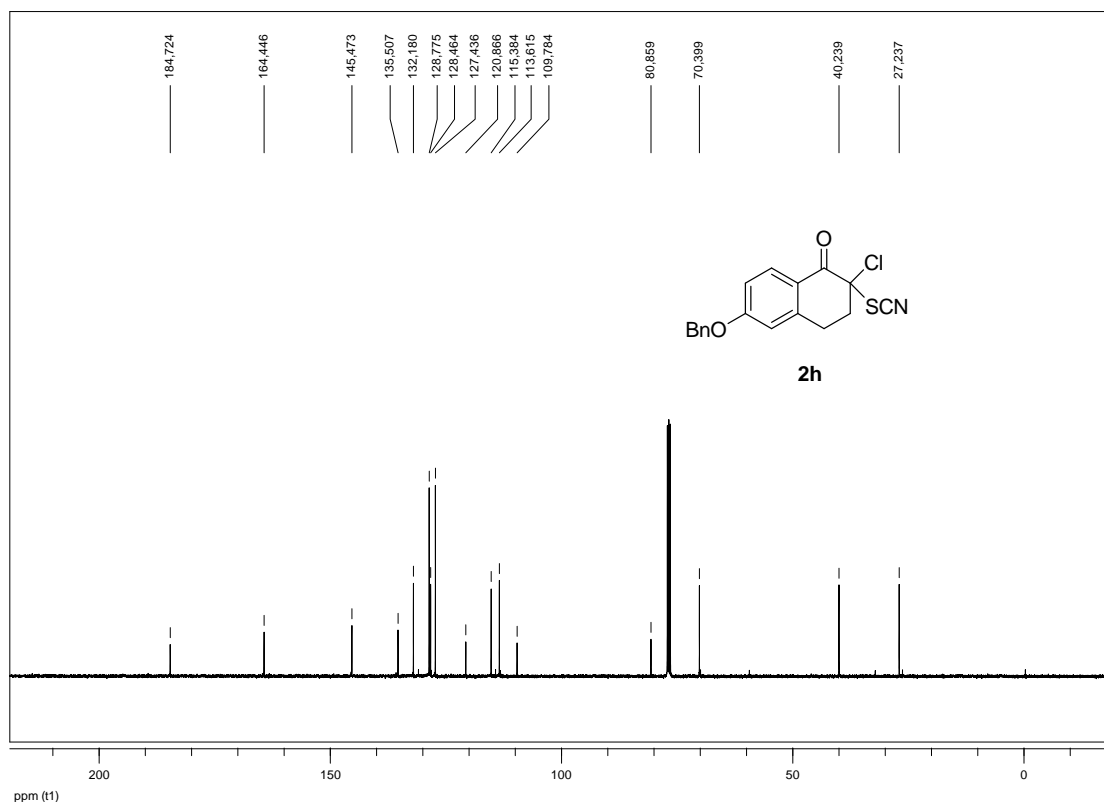

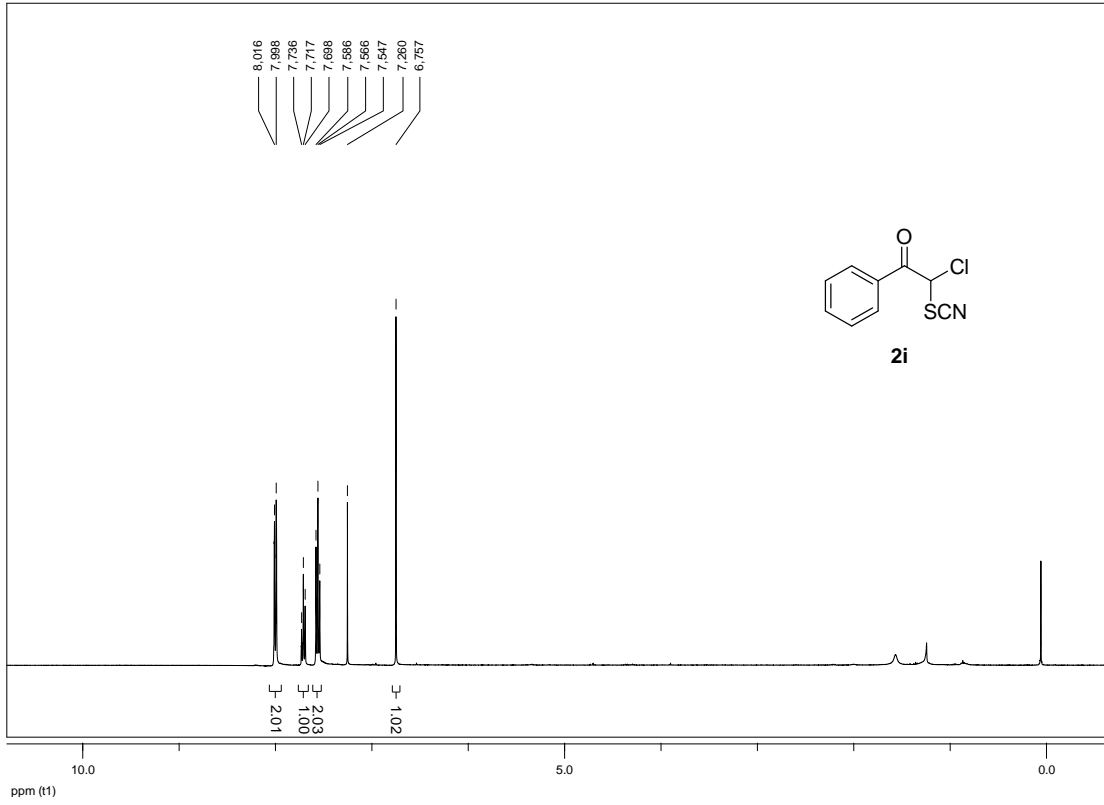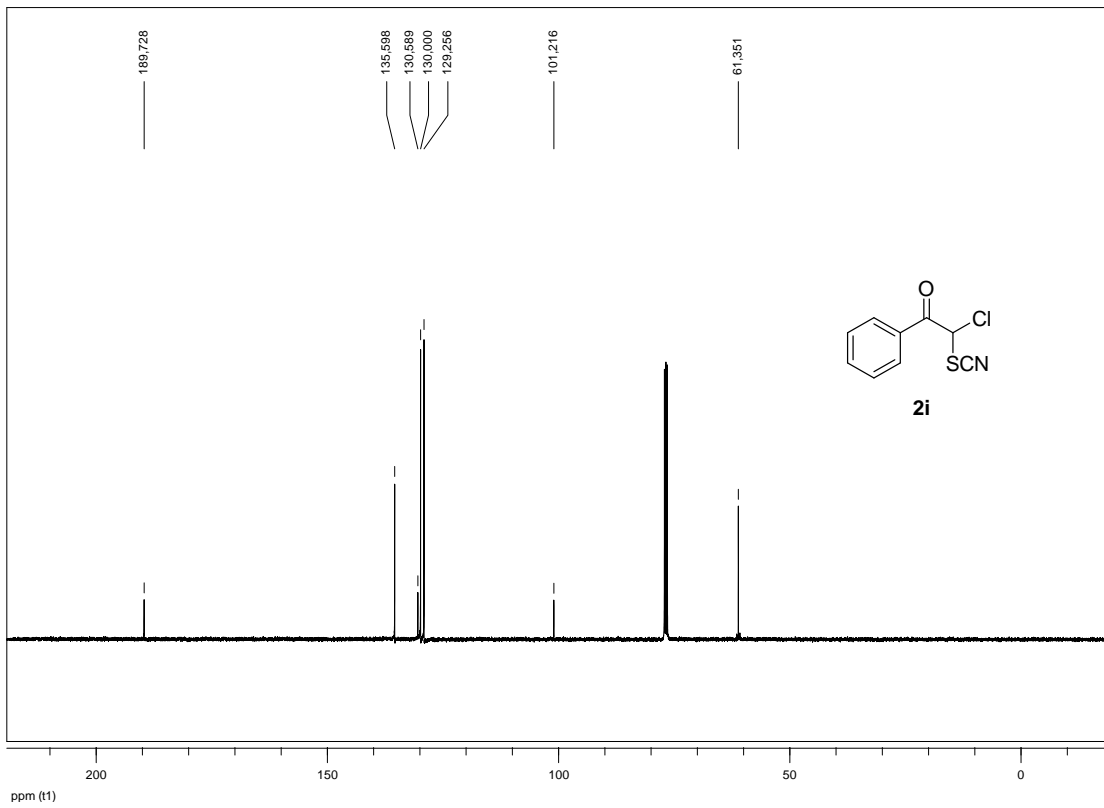

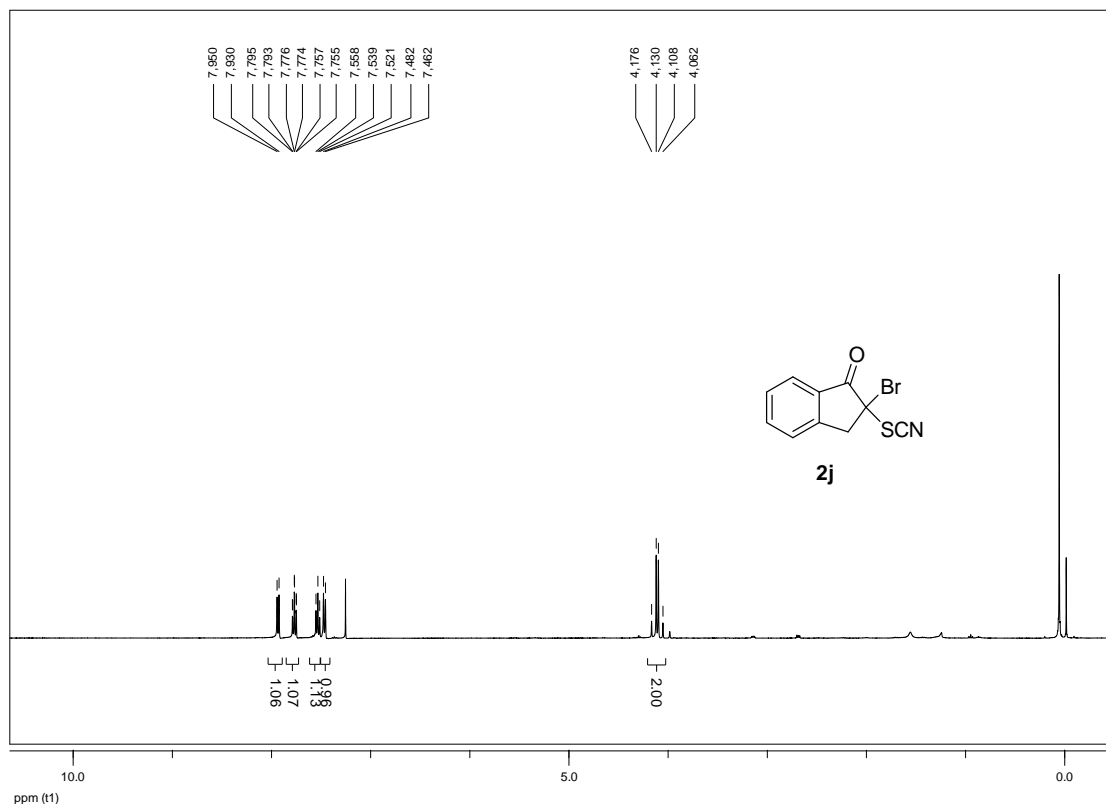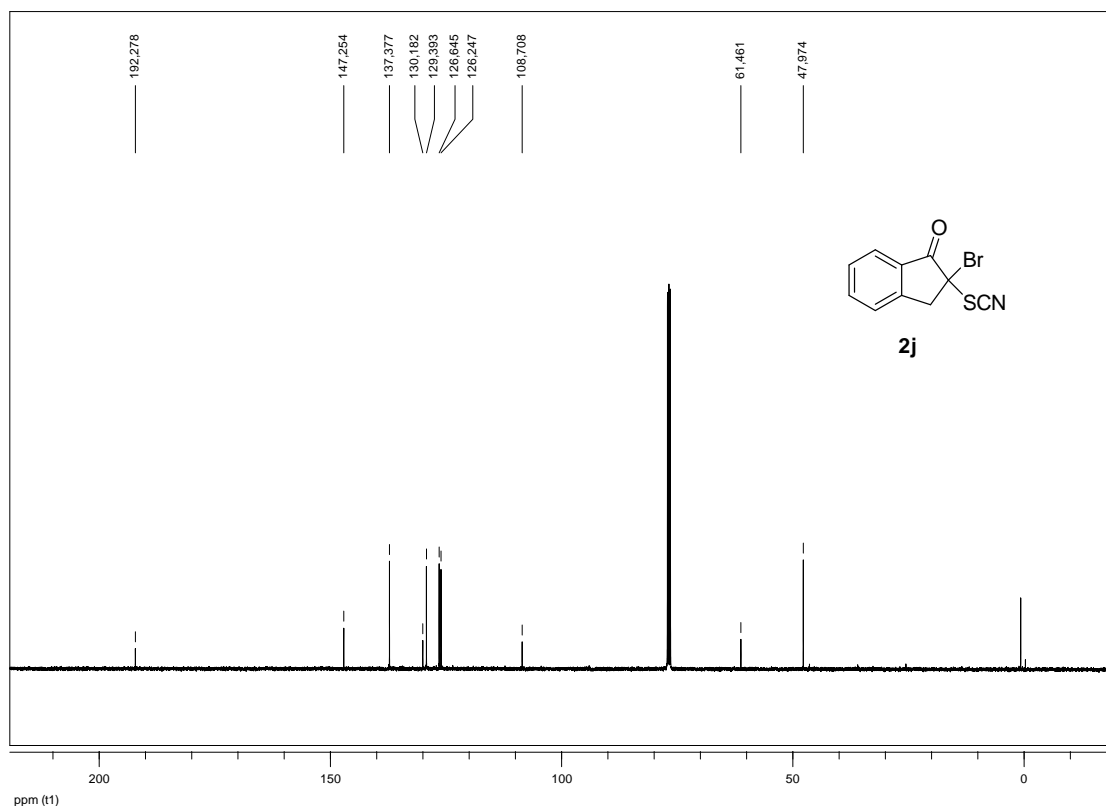

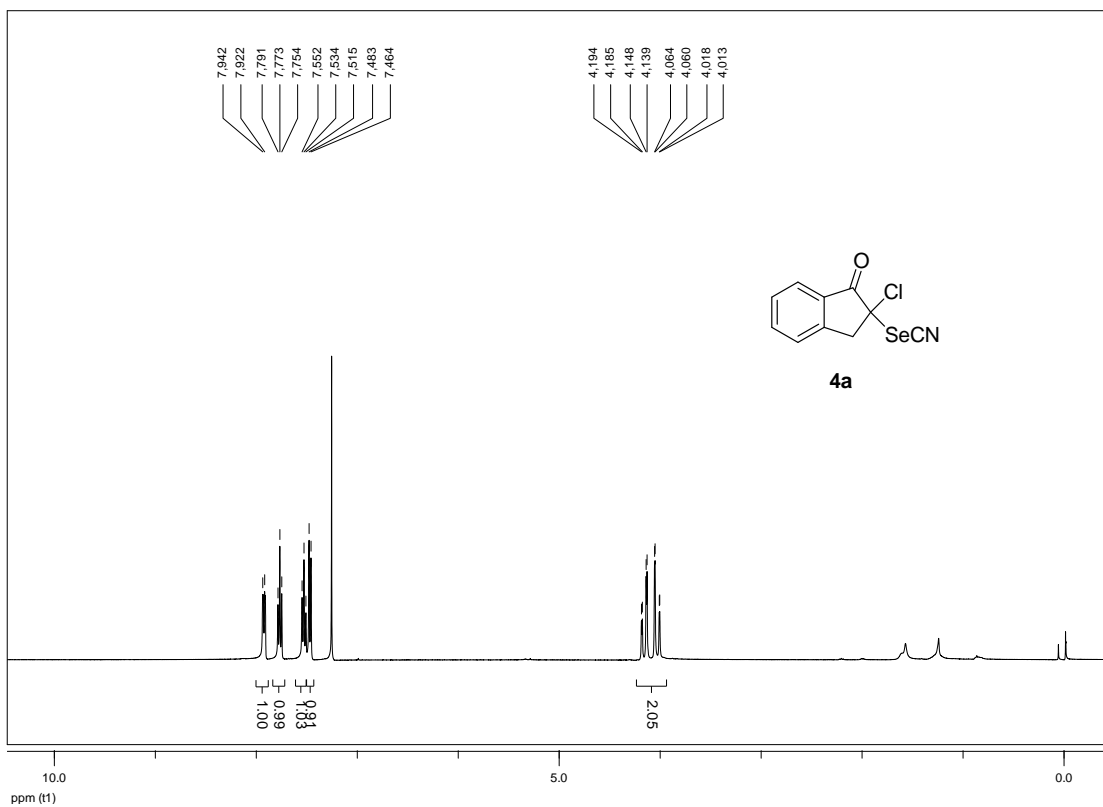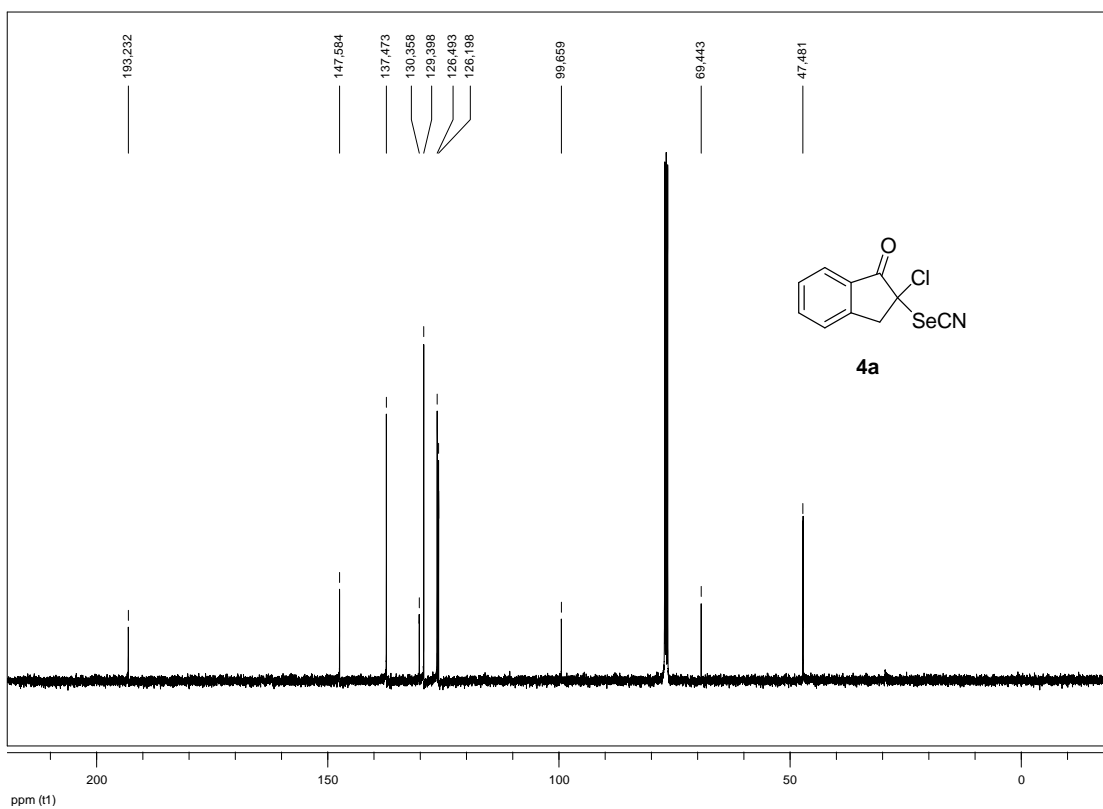

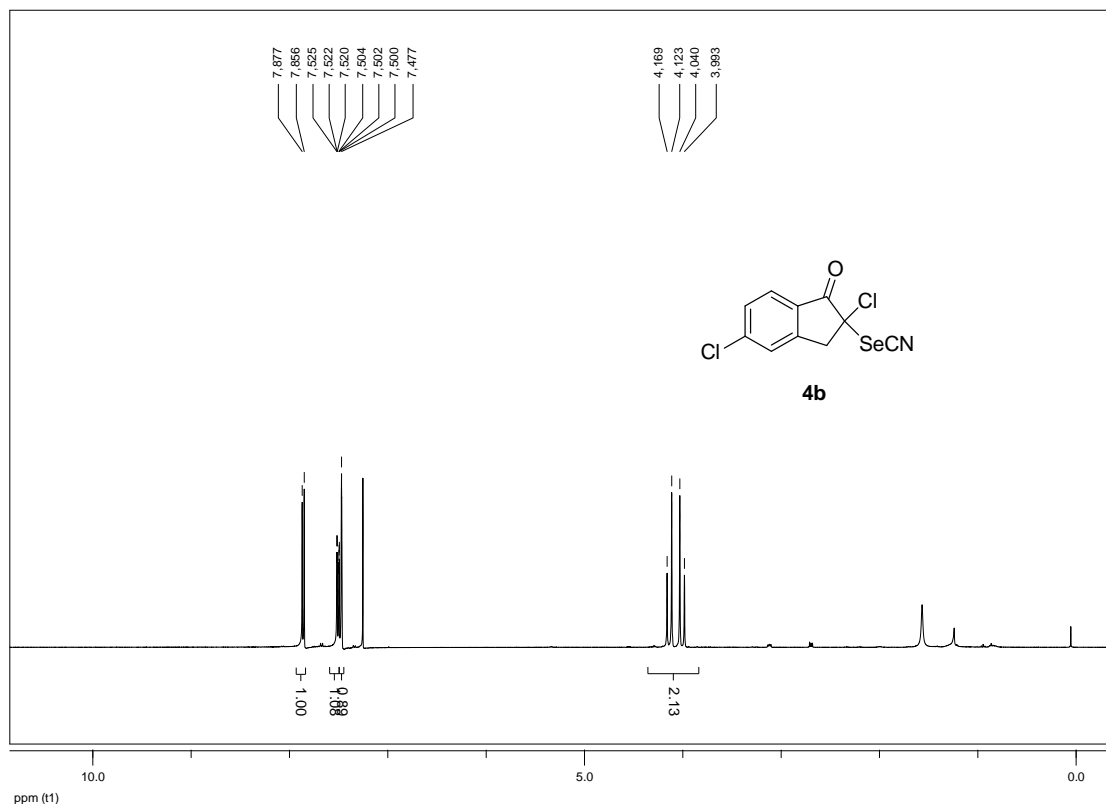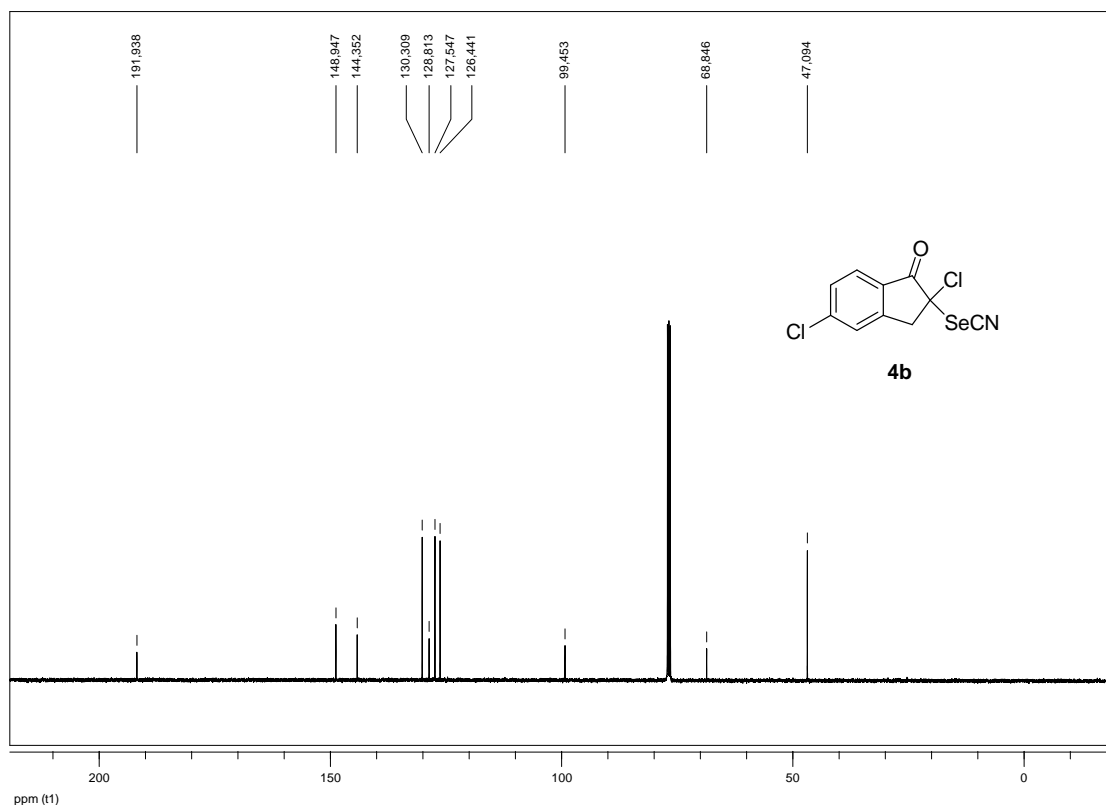

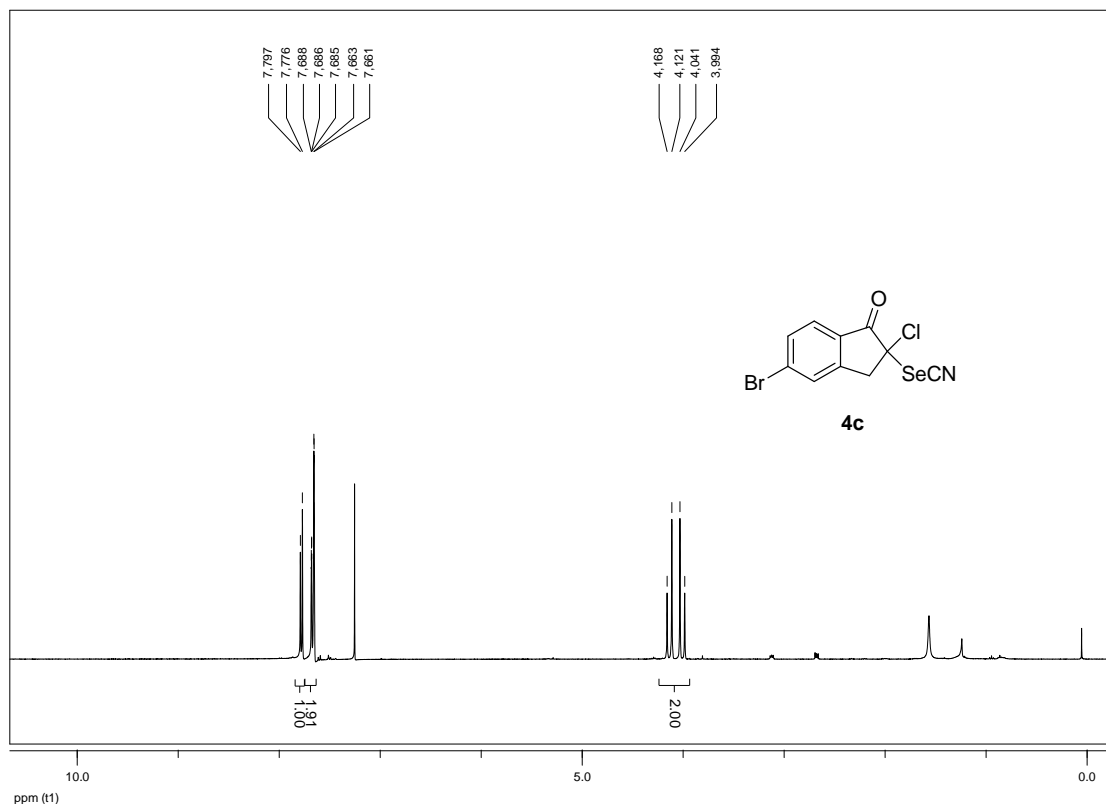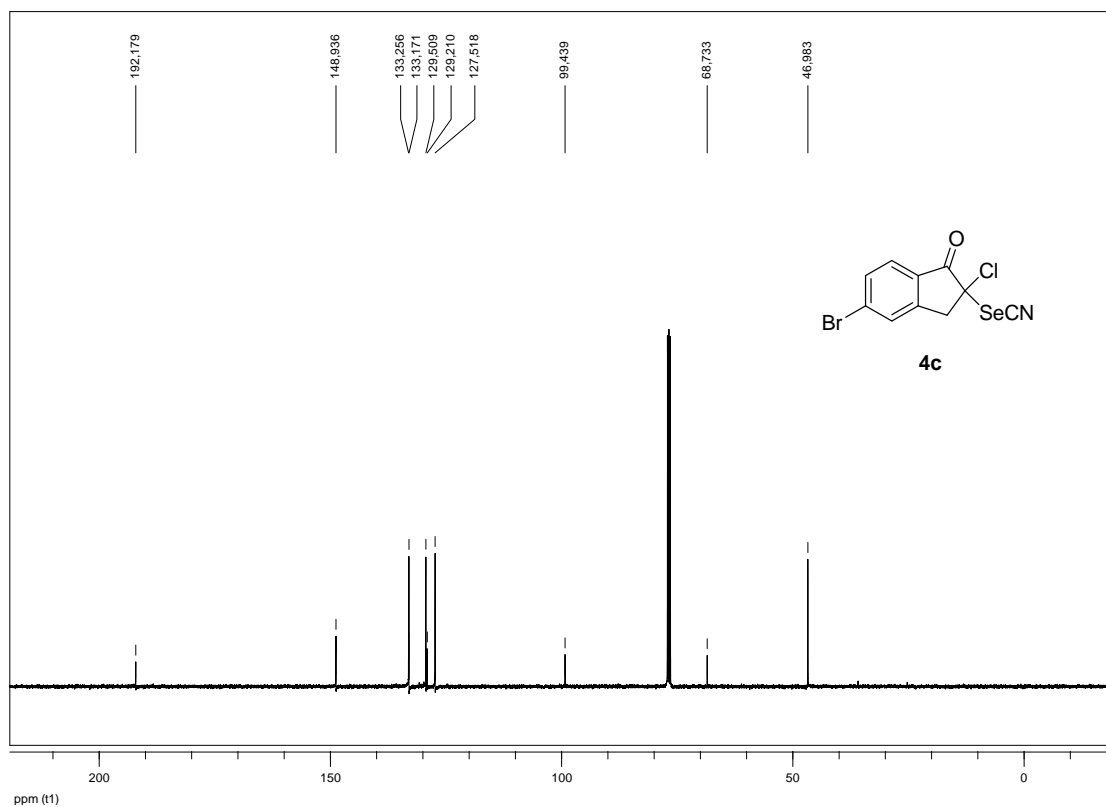



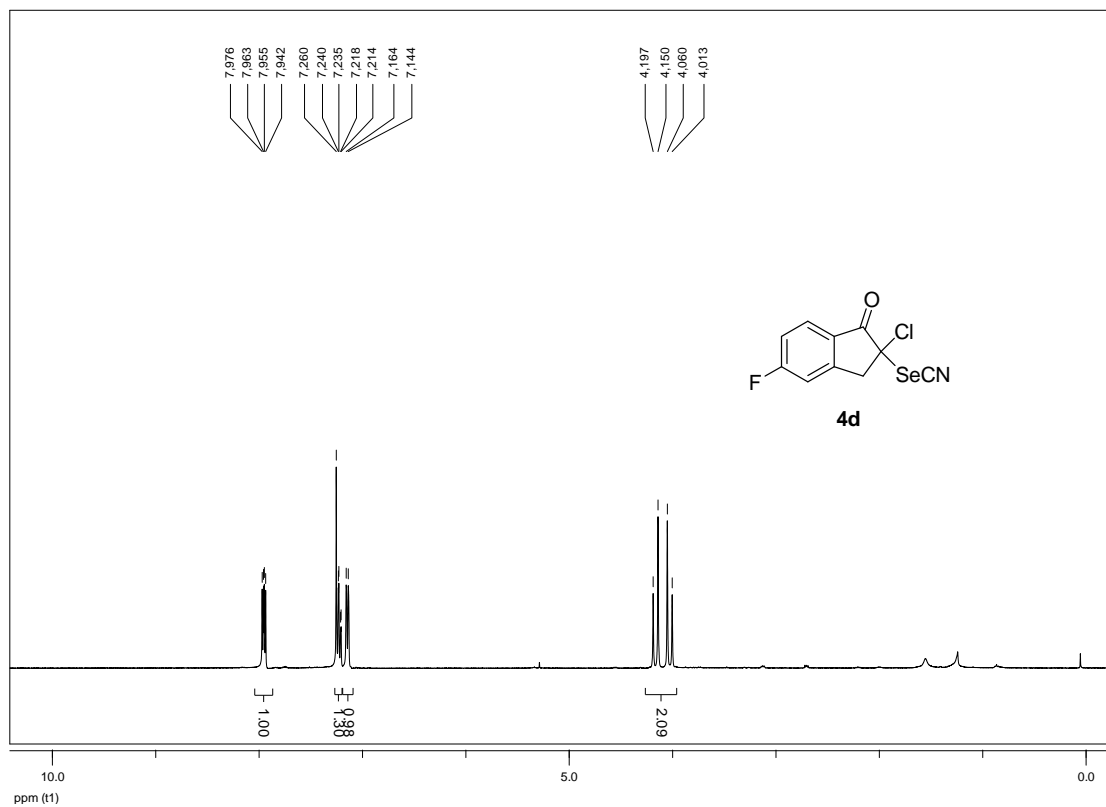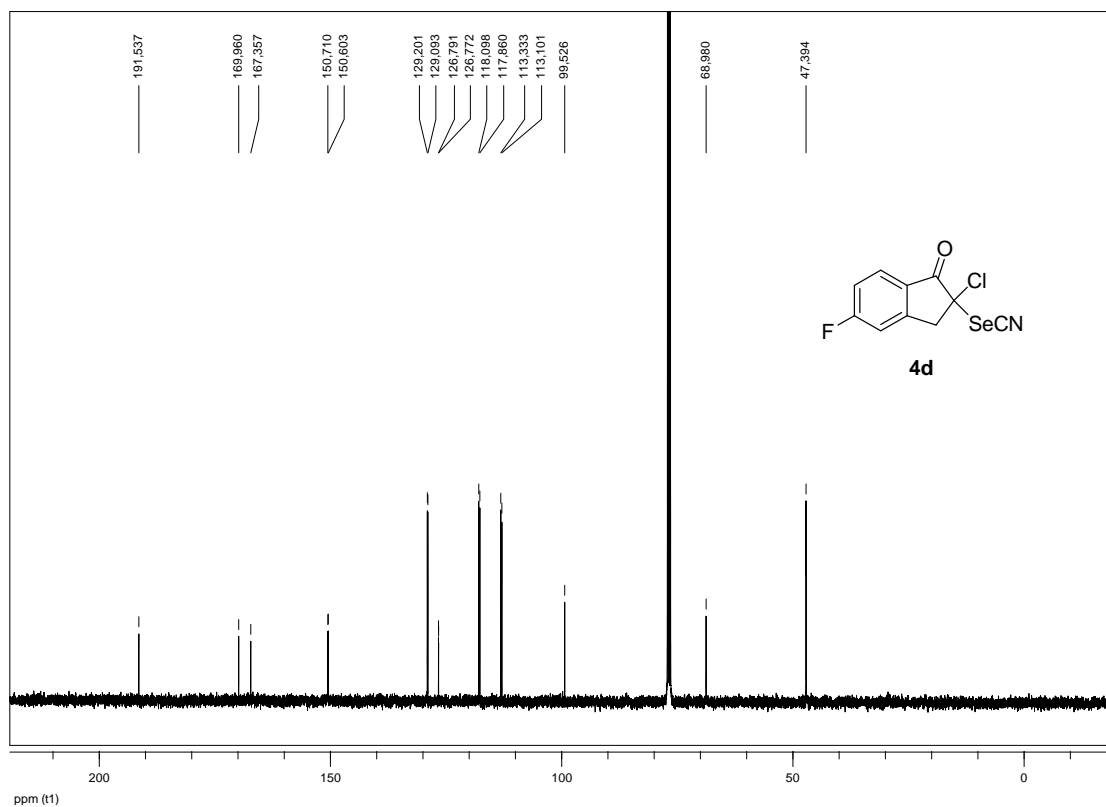

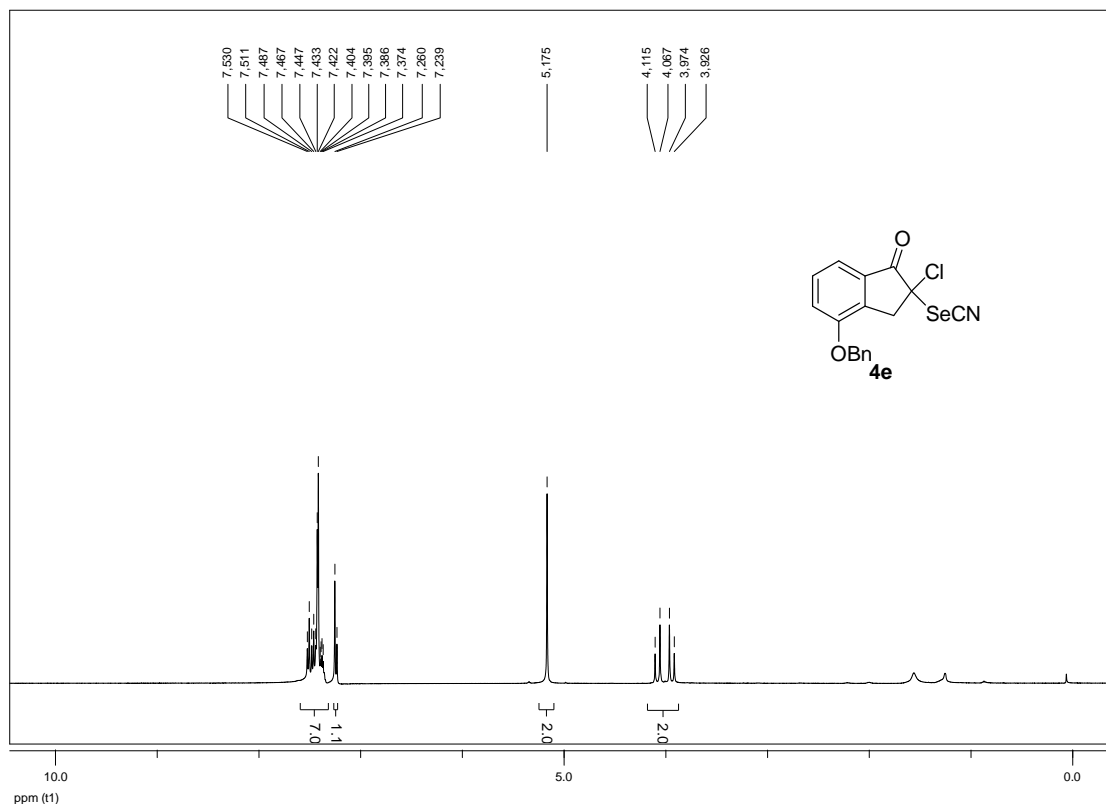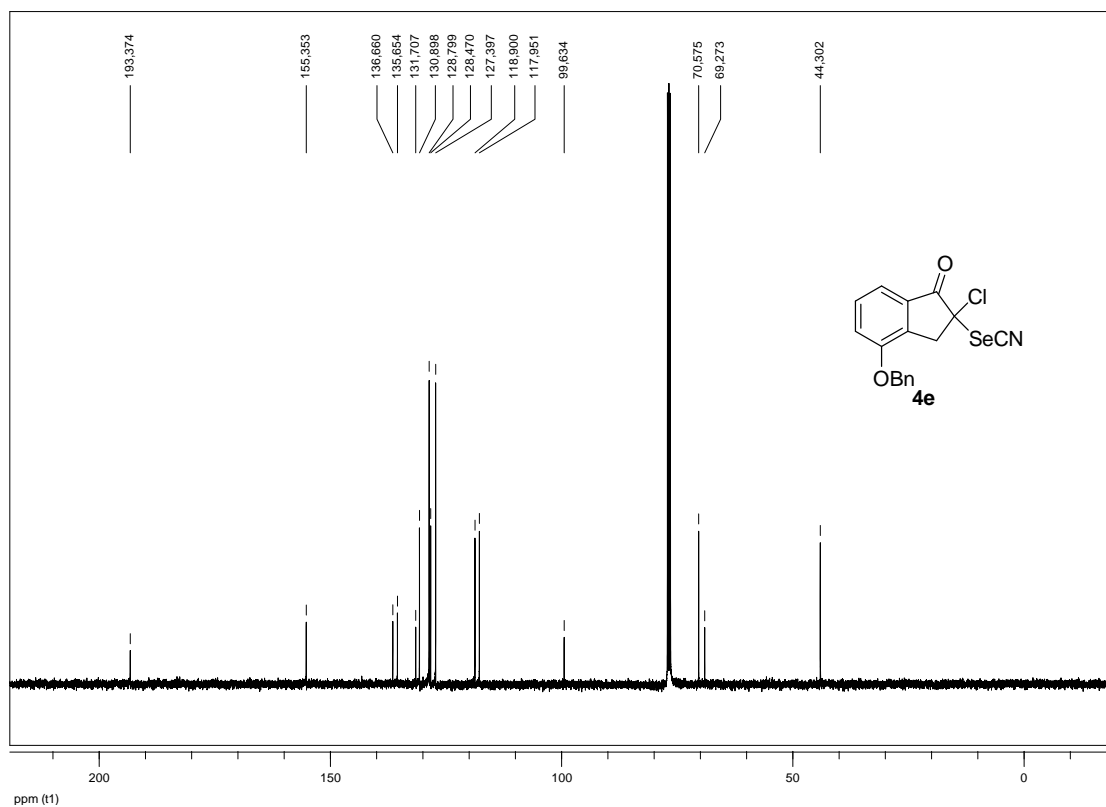

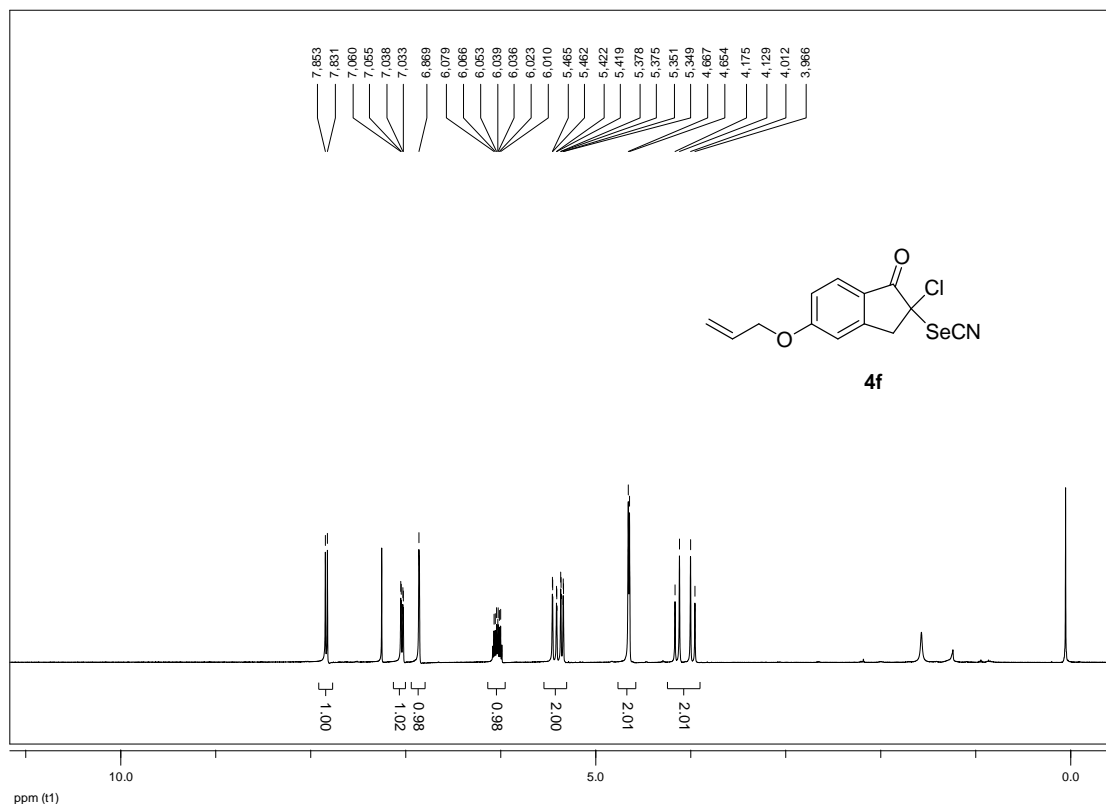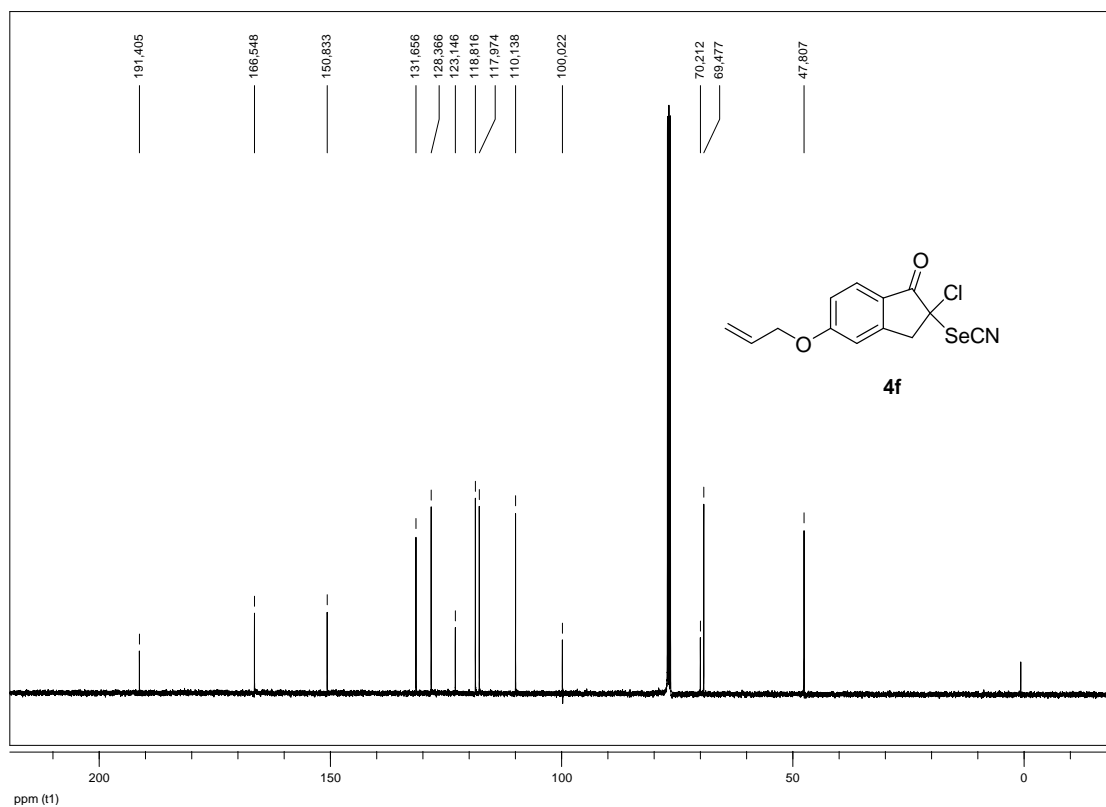

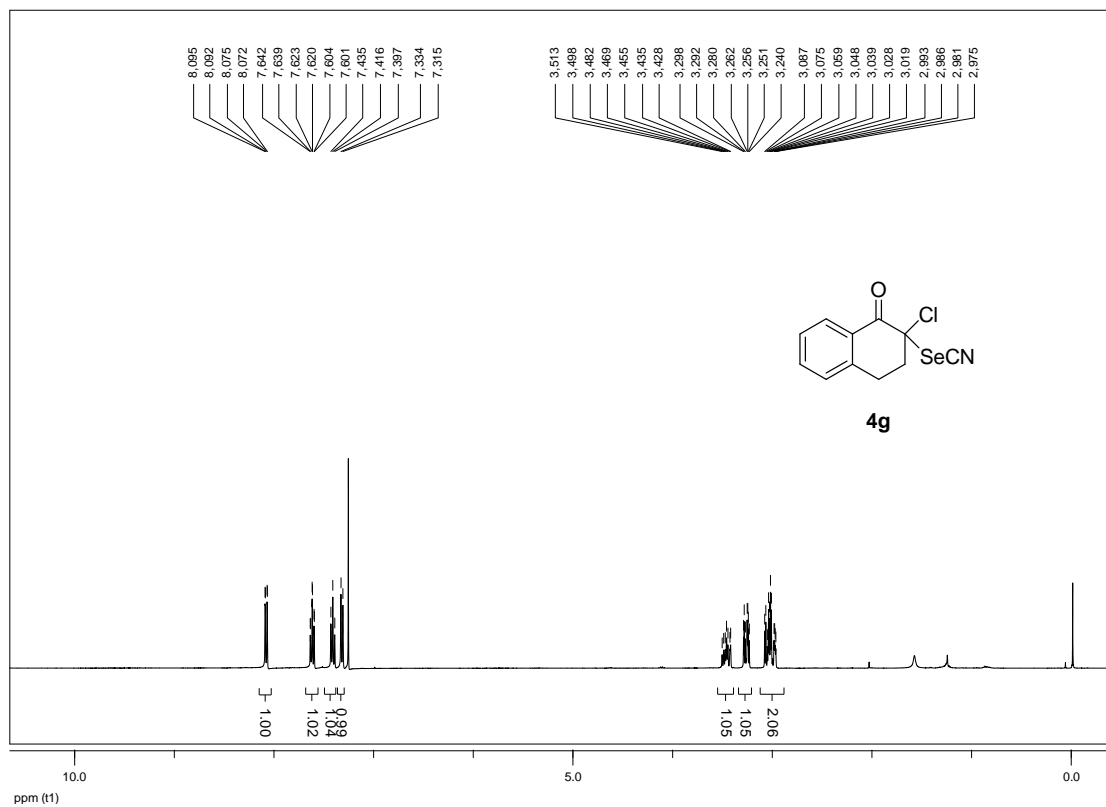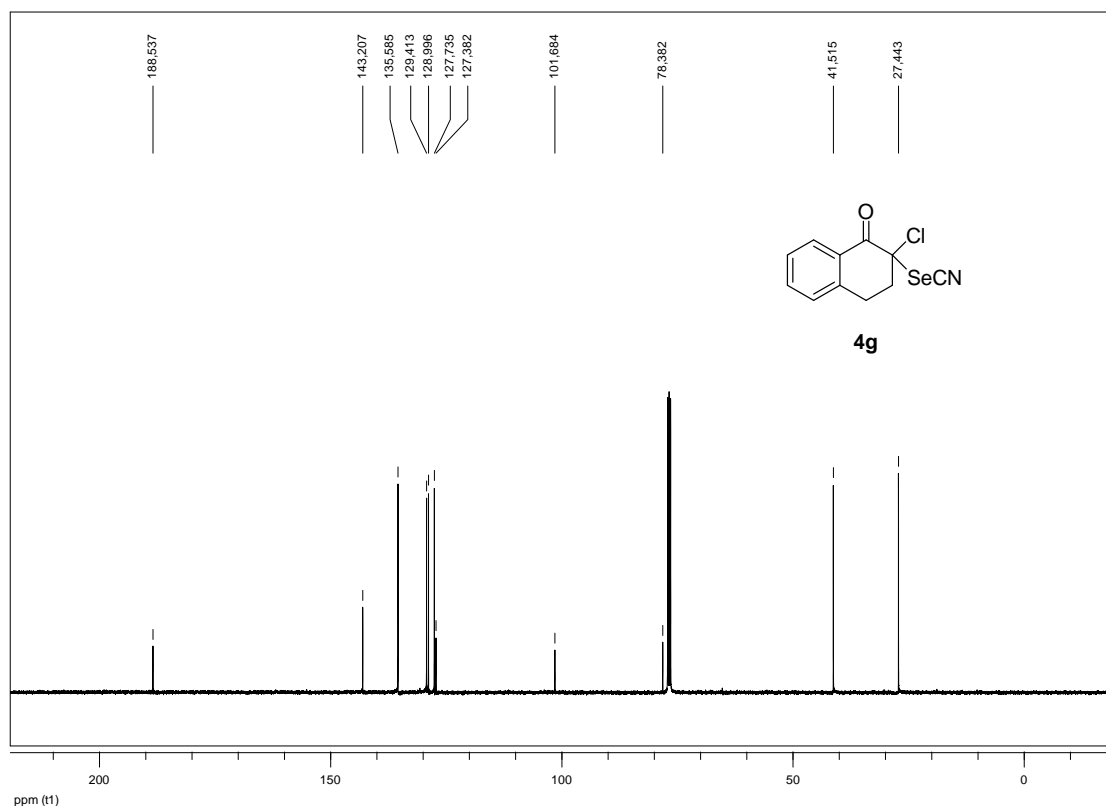

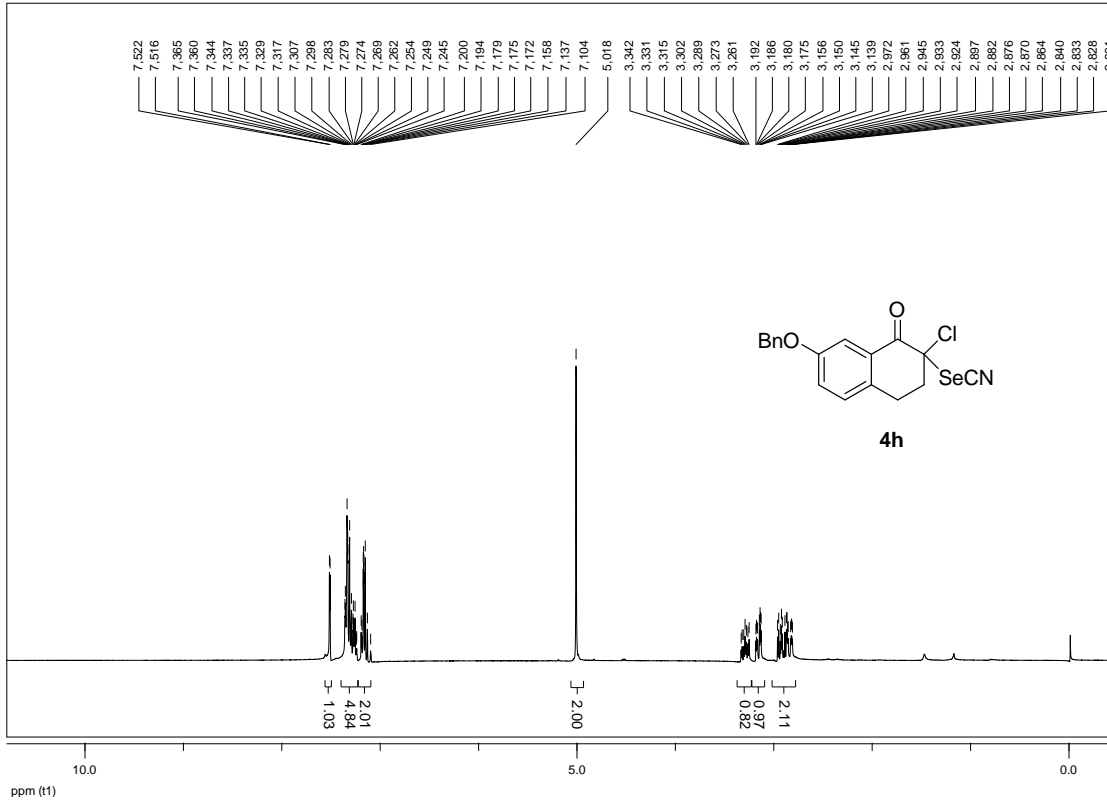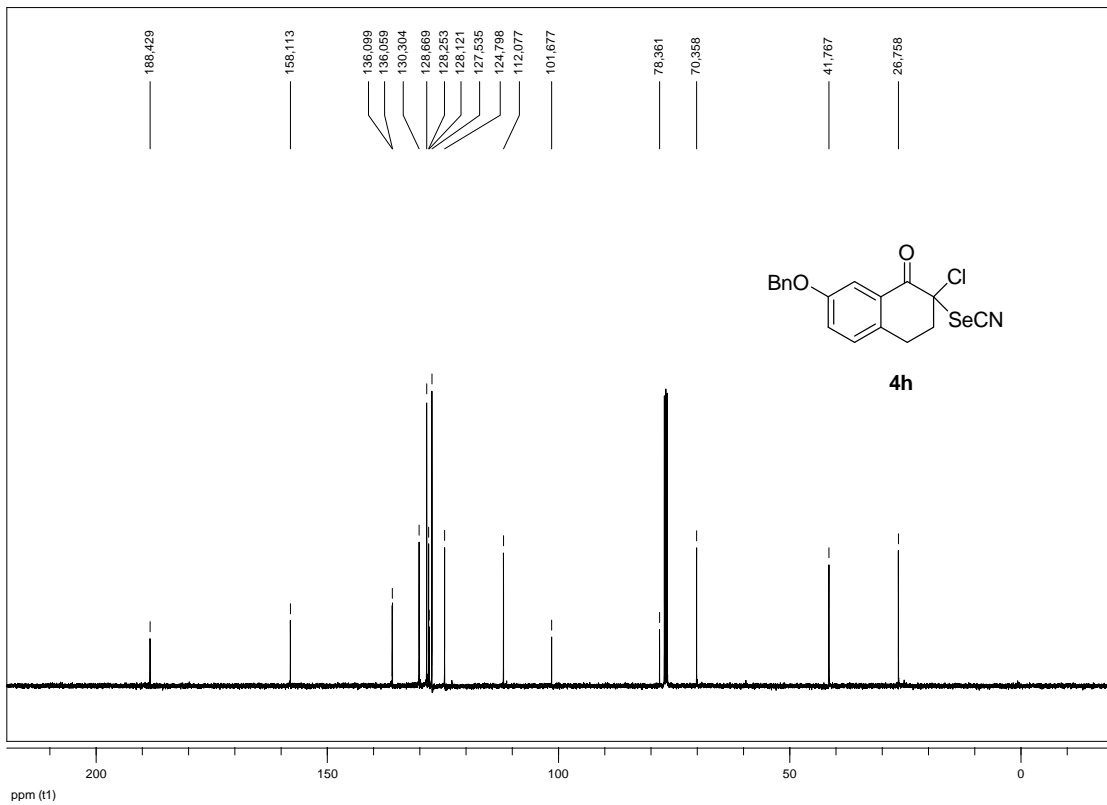

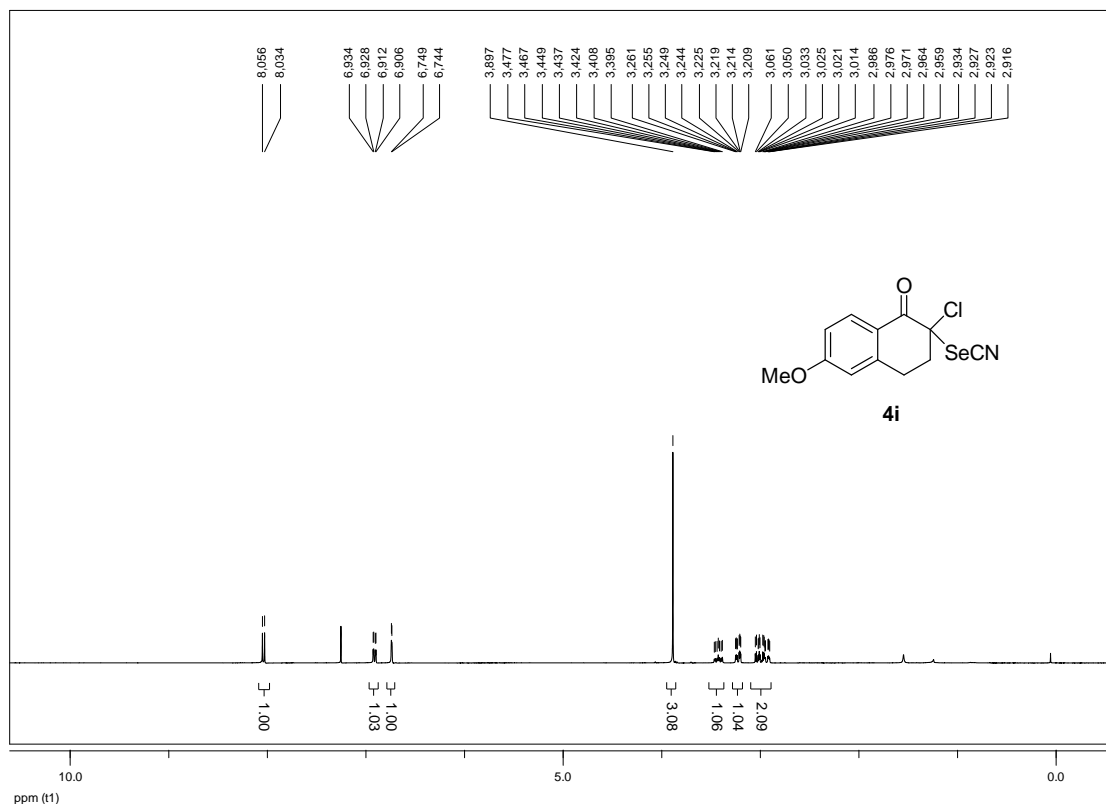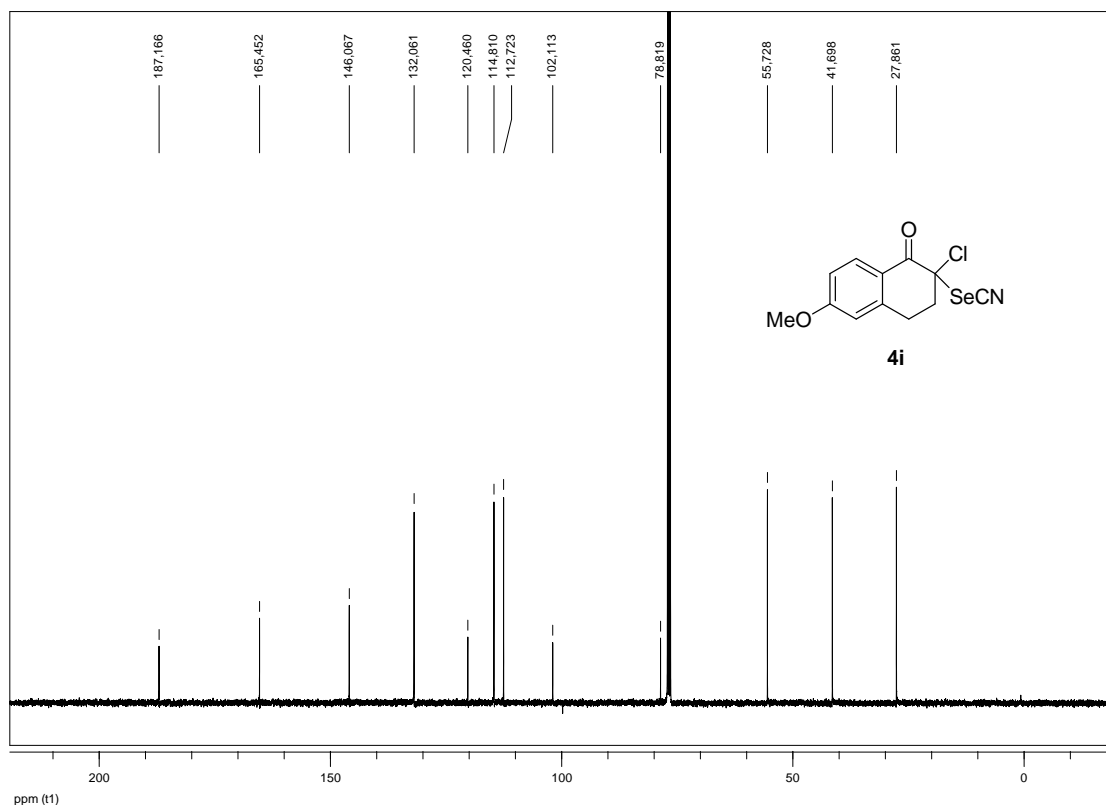

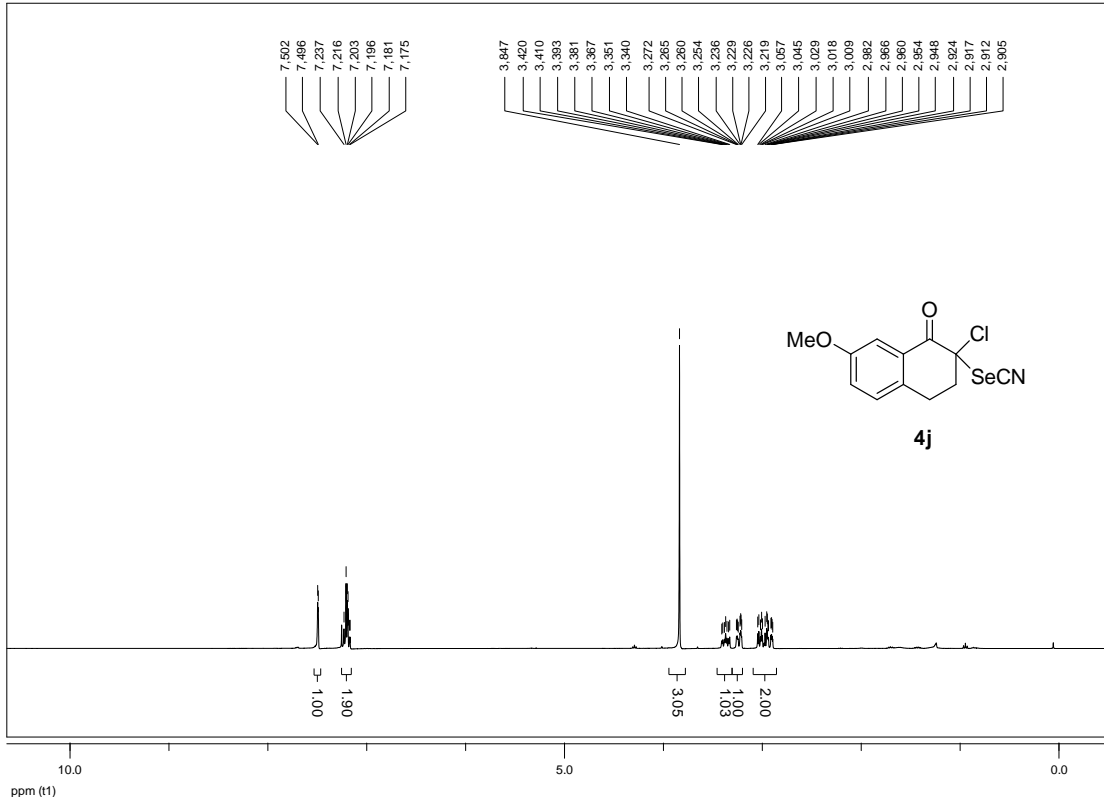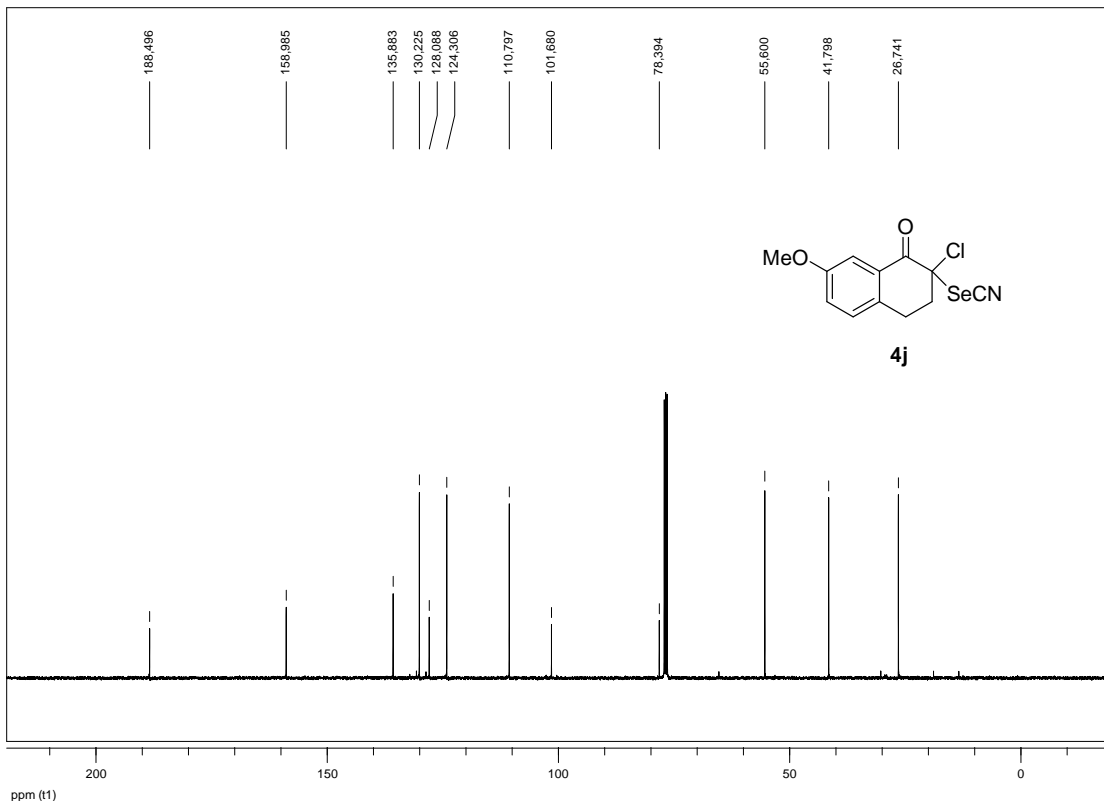

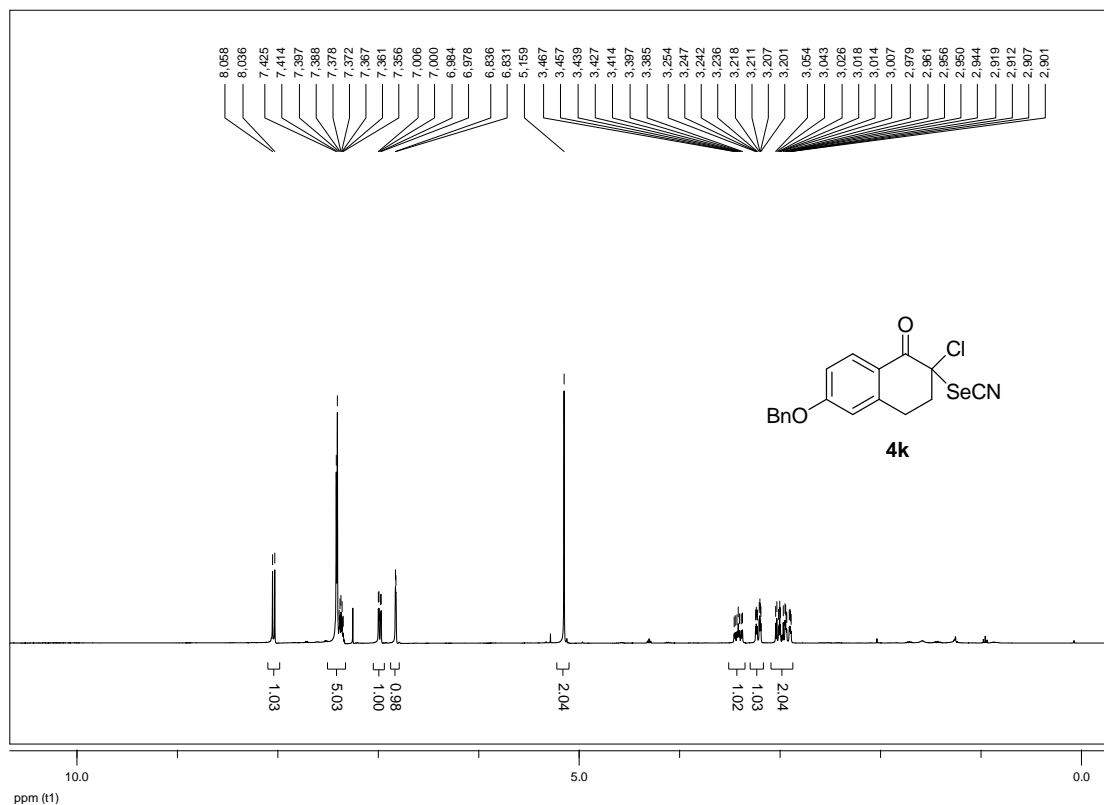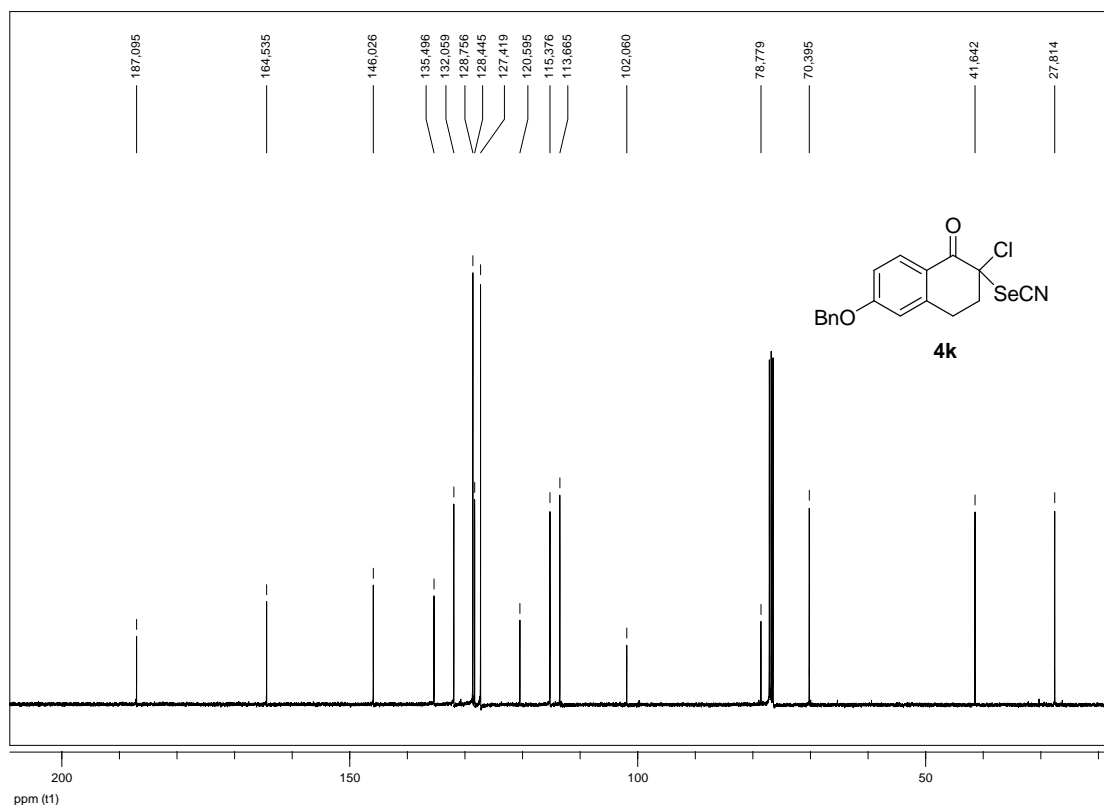



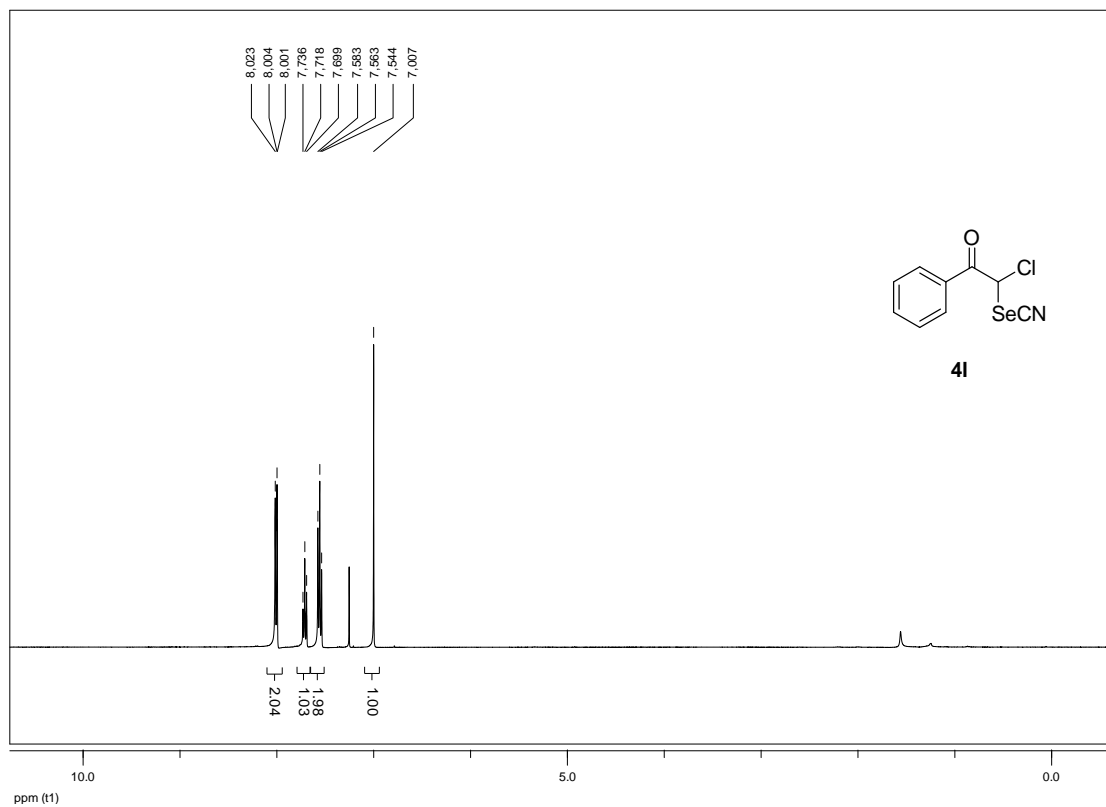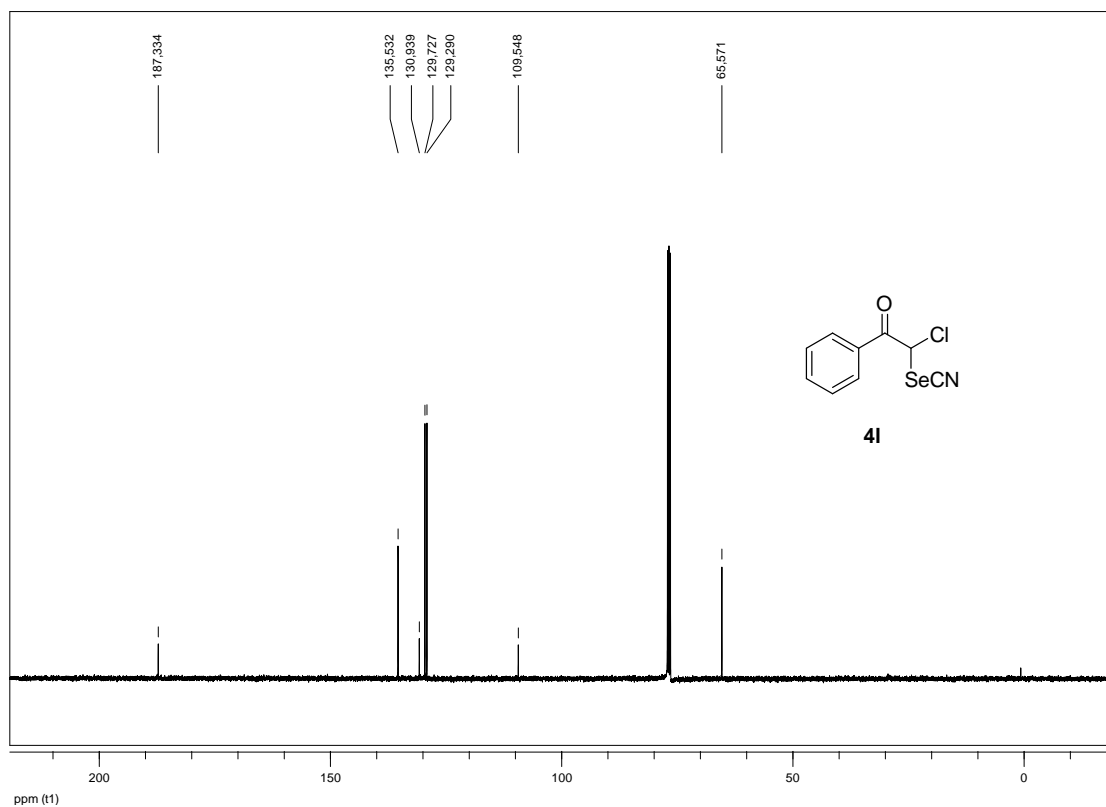

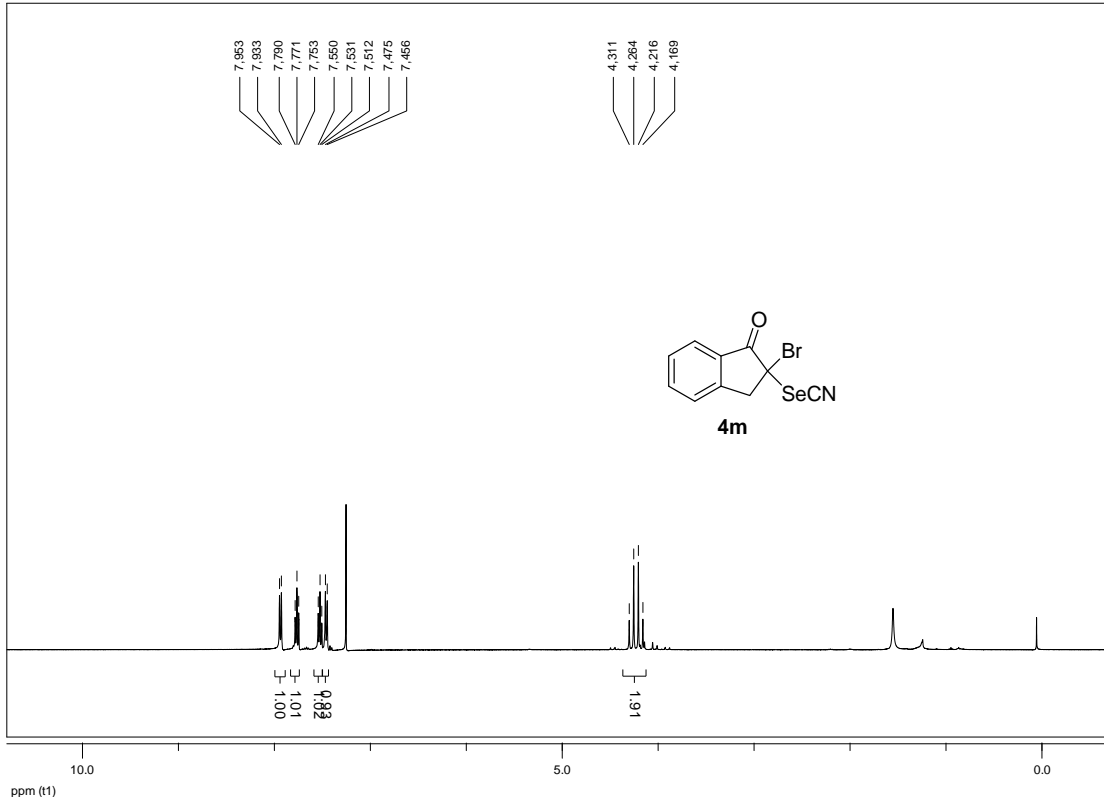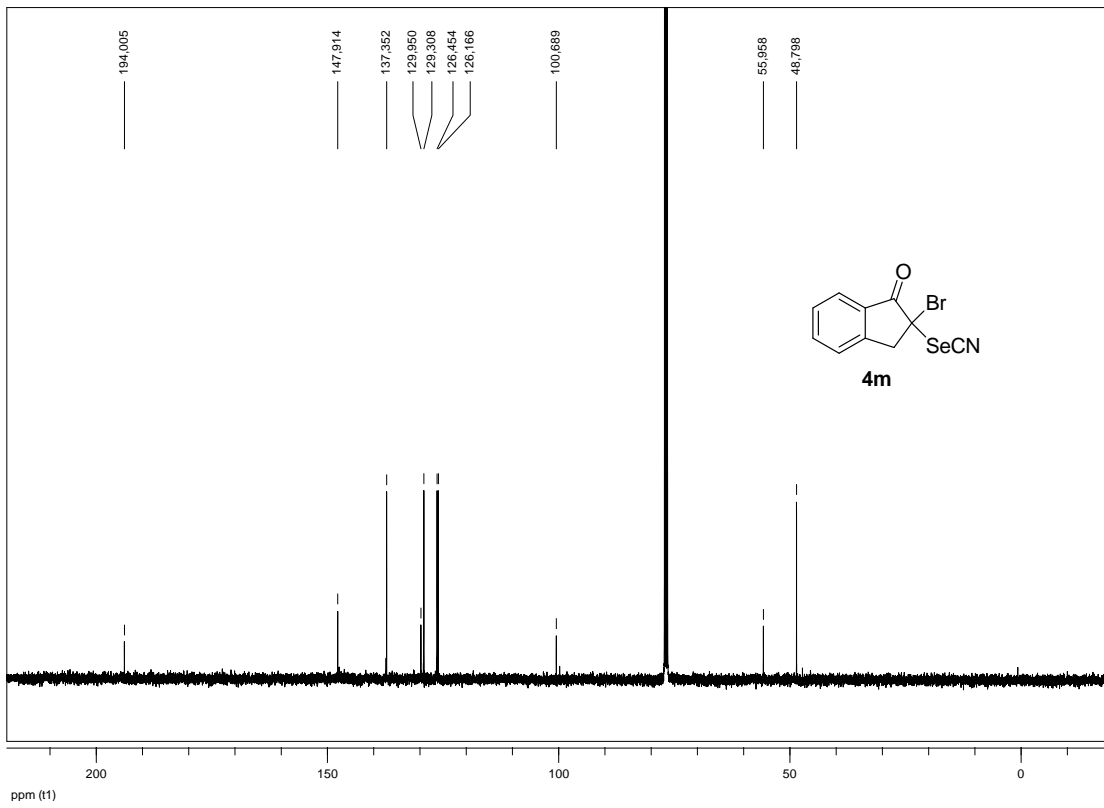

Supplement: d1qo00405k1.pdf [file d1qo00405k1.pdf]
